# Supplementary material for: Synthesis of pyrazino[1,2-b]indazoles via cascade cyclization of indazole aldehydes with propargylic amines
Source: Royal Society of Chemistry journal article supplement (doi:10.1039/d4ob00051j), 2024-01-01
Supplement: d4ob00051j1.pdf [file d4ob00051j1.pdf]

## Supporting Information

### Synthesis of pyrazino[1,2-*b*]indazoles *via* cascade cyclization of indazole aldehydes with propargylic amines

Zeng-Hui Wu,<sup>a</sup> Heng-Tong Qu,<sup>a</sup> Ben-Jun Han,<sup>a</sup> Jia-Xin Yang,<sup>a</sup> Xiang-Wei Chang<sup>\*a,b</sup> and Cheng-Tao Feng<sup>\*a</sup>

<sup>a</sup>School of Pharmacy, Anhui University of Chinese Medicine; Anhui academy of Chinese medicine, Hefei, 230012, China.

<sup>b</sup>MOE-Anhui Joint Collaborative Innovation Center for Quality Improvement of Anhui Genuine Chinese Medicinal Materials, Hefei, 230012, China.

#### Contents

|                                                                        |     |
|------------------------------------------------------------------------|-----|
| 1. General Information .....                                           | S2  |
| 2. Structures of starting materials .....                              | S3  |
| 3. Experimental Procedure .....                                        | S4  |
| 4. Biological Assay .....                                              | S6  |
| 5. Characterization Data of Products .....                             | S7  |
| 6. <sup>1</sup> H NMR and <sup>13</sup> C NMR Spectra of products..... | S14 |
| 7. Single-crystal X-ray Diffraction .....                              | S41 |
| 8. References .....                                                    | S42 |

## 1. General Information

All reagents and solvents were purchased from commercial sources and used without further purification. Reactions were performed under an atmosphere of air. Analytical TLC was performed with silica gel GF254 plates. Visualization was accomplished by UV light. Products were purified by flash column chromatography on 200-300 mesh silica gel. Flash chromatography was conducted eluting with PE/EA, and they are listed as volume/volume ratios.  $^1\text{H}$  and  $^{13}\text{C}$  NMR spectra were recorded in Chloroform- $d$  at 600 MHz ( $^1\text{H}$  NMR)/150 MHz ( $^{13}\text{C}$  NMR) on Bruker spectrometers. Chemical shifts are expressed in parts per million ( $\delta$ ) and the signals were reported as s (singlet), d (doublet), t (triplet), m (multiplet), and coupling constants ( $J$ ) were given in Hz. Chemical shifts as internal standard are referenced to  $\text{CDCl}_3$  ( $\delta = 7.26$  for  $^1\text{H}$  and  $\delta = 77.16$  for  $^{13}\text{C}$  NMR). High resolution mass spectra (HRMS) were measured using electrospray ionization (ESI) and the time-of-flight (TOF) mass analyzer, accurate masses are reported for the molecular ion + hydrogen ( $[\text{M}+\text{H}]^+$ ). Melting points were measured on a capillary melting point apparatus.

## 2. Structures of starting materials

Figure 1: Structures of aldehyde starting materials (1a-q)

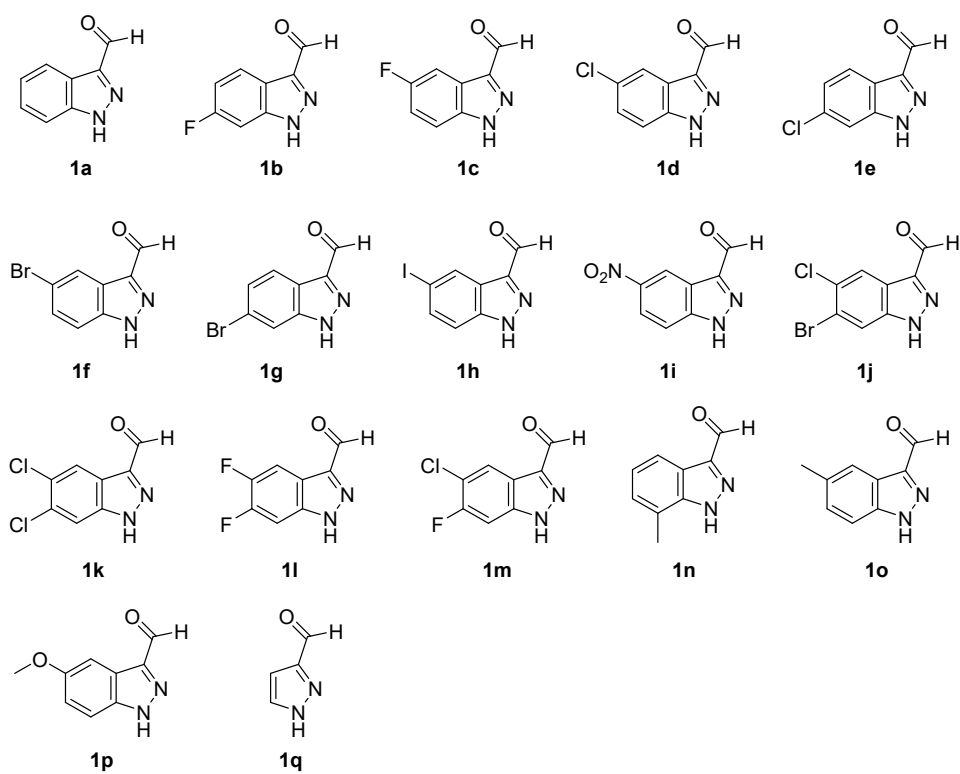

Figure 2: Structures of propargylic amines (2a-k)

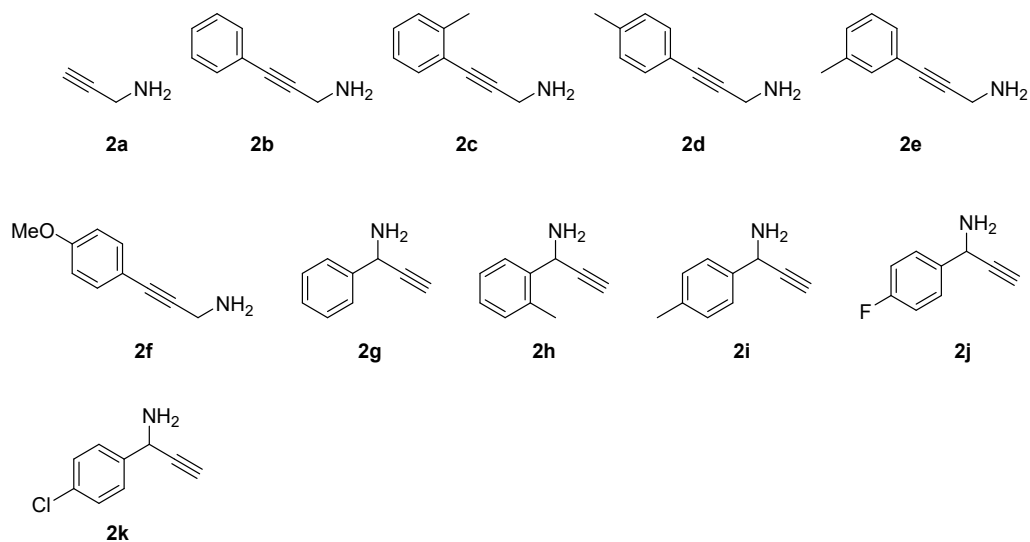

Commercially available aldehydes (1a, 1d, 1f, 1i, 1k and 1q) and propargylic amines (2a) were used without further purification and the other starting aldehydes (1b, 1c, 1e, 1f, 1g, 1h, 1j, 1l, 1m, 1n, 1o and 1p) and propargylic amines (2b, 2c, 2d, 2e, 2f, 2g, 2h, 2i, 2j and 2k) were synthesized as described below.

### 3. Experimental Procedures

#### 3.1 General procedure for the synthesis of **3**

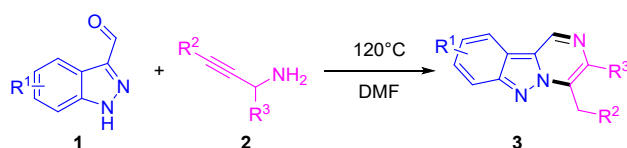

To a solution of aldehyde (0.4 mmol) in DMF (3 ml) was added amine (0.6 mmol) at room temperature. The reaction mixture was stirred for 10 min at room temperature, followed by 12 h at 120°C. After reaction finished, the mixture was cooled to room temperature, added water (45 mL), and extracted with EtOAc (3×15 mL). The combined organic layers were dried with Na<sub>2</sub>SO<sub>4</sub>. Then, the solvent was removed under reduced pressure and purified by silica gel column chromatography (petroleum ether/ethyl acetate).

#### 3.2 Scale-up procedure for the synthesis of **3aa**

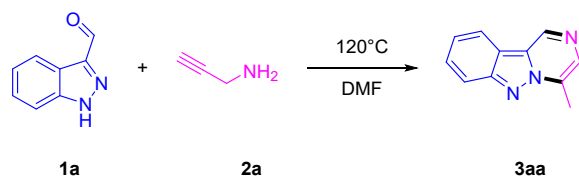

An oven-dried three-necked, round-bottom flask (100 mL), equipped with reflux condenser, was charged with 1H-indazole-3-carbaldehyde **1a** (5 mmol, 731 mg). Subsequently DMF (38 ml), propargylamine **2a** (7.5 mmol, 475ul) were added in order. The reaction was stirred at room temperature for 10 minutes, then further stirred at 120 °C for 12h. After completion of the reaction, the mixture was cooled to room temperature, then the reaction mixture was extracted with ethyl acetate. The organic phase was dried over anhydrous Na<sub>2</sub>SO<sub>4</sub> and concentrated under reduced pressure. Finally, it was purified by column chromatography on silica gel (200-300 mesh) using petroleum ether/ethylacetate (P:E = 1:2) as an eluent to afford the pure product **3aa** (613 mg, 67%).

#### 3.3 General procedure for the synthesis of aldehydes **2**

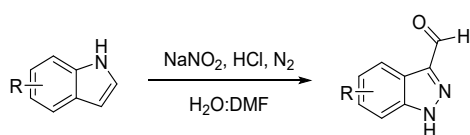

**1b, 1c, 1e, 1f, 1g, 1h, 1j, 1l, 1m, 1n, 1o** and **1p** were prepared by a literature procedure<sup>1</sup>. General procedure for 1 mmol of indole. To a solution of NaNO<sub>2</sub> (550 mg, 8 mmol, 8 equiv.) in 4 mL of deionized water and 3 mL of DMF at 0 °C was added slowly HCl (1.33 mL of 2 mol/L, 2.7 mmol, 2.7 equiv.) and the resulting mixture was kept under argon for 10 min. A solution of indole (1 mmol, 1 equiv.) in DMF (3 mL) was then added at 0 °C over a period of 2 h using a syringe. After reaction finished, added water, and extracted with EtOAc (3×15 mL). The combined organic layers were dried with Na<sub>2</sub>SO<sub>4</sub>. Then, the solvent was removed under reduced pressure and purified by silica gel column chromatography (petroleum ether/ ethyl acetate).

#### 3.4 General procedure for the synthesis of **2b, 2d, 2e** and **2f**

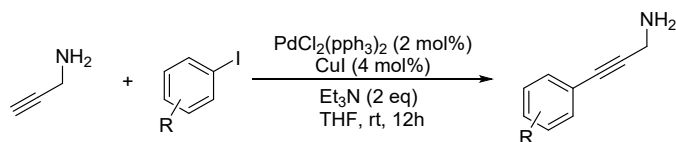

**2b, 2d, 2e and 2f** were prepared by a literature procedure<sup>2</sup>. To a degassed solution of aryl iodide (5.5 mmol) and propargylic amine (5.0 mmol) in THF/Et<sub>3</sub>N (4:1) under nitrogen, were added CuI (38.1 mg, 0.20 mmol) and PdCl<sub>2</sub>(PPh<sub>3</sub>)<sub>2</sub> (70.2 mg, 0.10 mmol) at room temperature. The mixture was stirred overnight, and an aqueous solution of saturated NH<sub>4</sub>Cl was added, and the mixture was extracted with EtOAc (3 x30 mL). The combined organic layer was washed with brine (50mL) and dried with Na<sub>2</sub>SO<sub>4</sub>, and concentrated under reduced pressure. The residue was purified by flash column chromatography on silica gel (petroleum ether/ethyl acetate) to give the corresponding propargylic amine derivatives in high yield.

#### 3.4 The synthesis of **2c, 2g, 2h, 2j** and **2k**

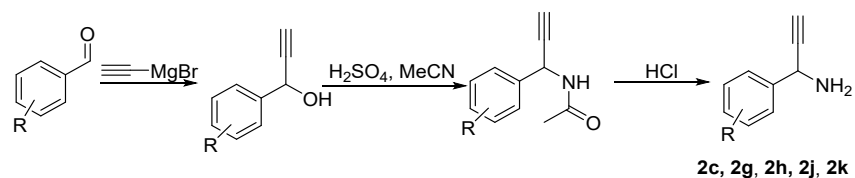

**2c, 2g, 2h, 2j** and **2k** was prepared by a literature procedure<sup>3</sup>.

## 4. Biological Assay

### Fungi.

*Rhizoctonia solani* (R.S.), *Sclerotonia sclerotiorum* (S.s.); *Valsa mali* (V.m.); *Botryosphaeria dothidea* (B.d.); *Alternaria alternata* (A.a.) and *Alternaria solani* (A.s.) were provided by Anhui University of Science and Technology.

### In Vitro Fungicidal Activities<sup>4</sup>.

The tested compounds were dissolved in DMSO to give a 10 mg/mL stock solution before mixing with PDA. The media containing compounds at a concentration of 25 mg/L were then poured into sterilized Petri dishes for primary screening. After 24-72 h at 28 °C, the colony diameter of each strain was measured. Percentage inhibition rate was calculated as  $(C-A)/(C-B) \times 100\%$ , where A represents the colony diameter in the Petri dishes with tested compounds, B represents the diameter of mycelial disc, and C is the mean colony diameter in control Petri dishes. Fluxapyroxad was selected as positive controls. Each treatment was performed three times. The inhibition rate of the potent compounds was further tested and the complete inhibition rate data is shown in the table S1 below.

**Table S1. Growth inhibition of the mycelium of the pathogenic fungi by pyrazino[1,2 b]indazoles.<sup>a</sup>**

| No | Compd               | Mycelium growth inhibition, %<br>(C = 25 mg·L <sup>-1</sup> ) |             |             |             |             |             |
|----|---------------------|---------------------------------------------------------------|-------------|-------------|-------------|-------------|-------------|
|    |                     | <i>R.s.</i>                                                   | <i>S.s.</i> | <i>V.m.</i> | <i>B.d.</i> | <i>A.a.</i> | <i>A.s.</i> |
| 1  | <b>3aa</b>          | 46.8 ± 6.0                                                    | 36.3 ± 1.3  | 34.4 ± 0.2  | 44.9 ± 3.0  | 54.7 ± 3.8  | 42.2 ± 0.7  |
| 2  | <b>3ba</b>          | 62.2 ± 1.0                                                    | 53.2 ± 4.2  | 32.6 ± 1.1  | 48.2 ± 1.5  | 51.6 ± 2.9  | 36.9 ± 1.0  |
| 3  | <b>3ca</b>          | 38.8 ± 0.5                                                    | 43.2 ± 0.7  | 58.7 ± 5.0  | 45.7 ± 1.8  | 49.5 ± 1.7  | 30.3 ± 1.0  |
| 4  | <b>3da</b>          | 65.9 ± 2.4                                                    | 63.8 ± 1.1  | 44.8 ± 0.6  | 34.2 ± 0.6  | 55.5 ± 0.6  | 46.4 ± 0.2  |
| 5  | <b>3ea</b>          | 65.8 ± 0.1                                                    | 57.3 ± 0.5  | 47.2 ± 2.9  | 56.8 ± 2.1  | 60.4 ± 0.4  | 52.7 ± 1.2  |
| 6  | <b>3fa</b>          | 52.3 ± 1.3                                                    | 67.7 ± 1.3  | 55.4 ± 4.1  | 50.9 ± 1.4  | 57.8 ± 0.6  | 53.4 ± 2.2  |
| 7  | <b>3ga</b>          | 47.9 ± 2.3                                                    | 46.9 ± 3.1  | 44.7 ± 1.5  | 43.8 ± 3.4  | 49.0 ± 0.9  | 41.6 ± 5.0  |
| 8  | <b>3ha</b>          | 58.2 ± 2.5                                                    | 7.6 ± 0.8   | 16.4 ± 4.0  | 5.2 ± 0.3   | 6.5 ± 1.5   | <5          |
| 9  | <b>3ia</b>          | <5                                                            | 28.9 ± 2.4  | 8.2 ± 2.8   | 22.4 ± 4.6  | 30.1 ± 0.3  | 22.9 ± 0.6  |
| 10 | <b>3ja</b>          | 15.7 ± 1.8                                                    | 17.8 ± 0.6  | 30.1 ± 4.1  | 9.0 ± 2.3   | <5          | /           |
| 11 | <b>3ka</b>          | 26.3 ± 2.6                                                    | 19.8 ± 1.1  | 61.0 ± 3.1  | 9.7 ± 2.0   | <5          | /           |
| 12 | <b>3la</b>          | 35.0 ± 1.0                                                    | 23.9 ± 0.5  | 40.0 ± 5.1  | 10.6 ± 2.2  | 11.2 ± 1.6  | /           |
| 13 | <b>3ma</b>          | 63.6 ± 5.9                                                    | 31.4 ± 0.3  | 76.5 ± 4.0  | 33.8 ± 2.8  | <5          | /           |
| 14 | <b>3oa</b>          | 41.7 ± 1.9                                                    | 46.3 ± 2.5  | 48.0 ± 2.3  | 41.4 ± 1.9  | 59.9 ± 5.7  | 46.1 ± 1.2  |
| 15 | <b>3pa</b>          | 22.8 ± 3.0                                                    | 44.6 ± 0.5  | 31.3 ± 2.4  | 33.2 ± 4.6  | 51.4 ± 0.7  | 43.3 ± 1.2  |
| 16 | <b>3ab</b>          | 41.6 ± 4.0                                                    | 22.0 ± 1.8  | 68.1 ± 4.3  | 26.3 ± 0.8  | 24.5 ± 1.2  | 10.2 ± 3.4  |
| 17 | <b>3ad</b>          | 8.2 ± 0.9                                                     | 8.1 ± 2.8   | 18.0 ± 2.5  | 7.9 ± 1.2   | 12.3 ± 1.1  | 14.1 ± 0.4  |
| 18 | <b>3af</b>          | 29.2 ± 3.4                                                    | 8.1 ± 1.3   | 36.0 ± 4.2  | 11.6 ± 2.3  | 21.5 ± 0.6  | 12.0 ± 1.6  |
| 19 | <b>3ag</b>          | 41.9 ± 0.5                                                    | 14.9 ± 2.2  | 4.9 ± 1.6   | 16.8 ± 4.8  | 13.8 ± 0.8  | 9.0 ± 0.2   |
| 20 | <b>3ai</b>          | 37.0 ± 3.0                                                    | 7.1 ± 0.3   | 24.6 ± 1.8  | 15.6 ± 1.7  | 9.4 ± 1.8   | 2.4 ± 1.1   |
| 21 | <b>3aj</b>          | 10.1 ± 3.6                                                    | <5          | 5.2 ± 2.0   | 8.8 ± 2.6   | 13.7 ± 0.6  | 6.5 ± 0.9   |
| 22 | <b>3ak</b>          | 48.2 ± 0.8                                                    | 40.8 ± 0.9  | 39.1 ± 2.3  | 27.5 ± 2.5  | 32.0 ± 2.4  | 50.0 ± 2.2  |
| 23 | <b>fluxapyroxad</b> | 88.5 ± 2.7                                                    | 93.3 ± 3.3  | 20.2 ± 0.7  | 35.4 ± 1.1  | 93.8 ± 1.4  | 94.2 ± 2.1  |

<sup>a</sup>Data are given as the mean of triplicate experiments.

## 5. Characterization Data of Products

### 4-methylpyrazino[1,2-*b*]indazole (3aa)

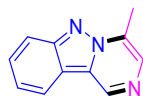

Yield 71%, red solid; mp: 170-172 °C; <sup>1</sup>H NMR (600 MHz, CDCl<sub>3</sub>) δ 9.44 (s, 1H), 8.19 (d, *J* = 8.2 Hz, 1H), 8.16 (s, 1H), 8.01 (d, *J* = 8.6 Hz, 1H), 7.65 (t, *J* = 7.7 Hz, 1H), 7.44 – 7.38 (m, 1H), 2.90 (s, 3H). <sup>13</sup>C NMR (151 MHz, CDCl<sub>3</sub>) δ 149.2, 140.7, 133.2, 131.2, 130.5, 129.1, 122.6, 119.7, 116.9, 115.7, 15.5. HRMS (ESI): calculated for C<sub>11</sub>H<sub>10</sub>N<sub>3</sub> [M+H]<sup>+</sup> 184.0869, found 184.0869.

### 8-fluoro-4-methylpyrazino[1,2-*b*]indazole (3ba)

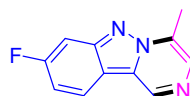

Yield 56%, red solid; mp: 182-185 °C; <sup>1</sup>H NMR (600 MHz, CDCl<sub>3</sub>) δ 9.38 (s, 1H), 8.16 – 8.10 (m, 2H), 7.56 (dd, *J* = 9.7, 2.3 Hz, 1H), 7.16 (td, *J* = 9.0, 2.2 Hz, 1H), 2.87 (s, 3H). <sup>13</sup>C NMR (151 MHz, CDCl<sub>3</sub>) δ 163.4 (d, <sup>1</sup>*J*<sub>CF</sub> = 247.1 Hz), 149.8 (d, *J*<sub>CF</sub> = 13.2 Hz), 140.2, 133.1, 131.4, 130.5, 121.4 (d, *J*<sub>CF</sub> = 10.9 Hz), 113.2 (d, <sup>2</sup>*J*<sub>CF</sub> = 27.3 Hz), 112.4, 101.0 (d, <sup>2</sup>*J*<sub>CF</sub> = 24.1 Hz), 15.4. HRMS (ESI): calculated for C<sub>11</sub>H<sub>9</sub>FN<sub>3</sub> [M+H]<sup>+</sup> 202.0775 found 202.0775.

### 9-fluoro-4-methylpyrazino[1,2-*b*]indazole (3ca)

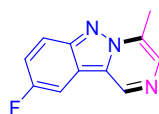

Yield 63%, red solid; mp: 145-148 °C; <sup>1</sup>H NMR (600 MHz, CDCl<sub>3</sub>) δ 9.35 (s, 1H), 8.12 (s, 1H), 7.94 (dd, *J* = 9.3, 4.4 Hz, 1H), 7.74 (dd, *J* = 8.3, 2.5 Hz, 1H), 7.40 (td, *J* = 9.1, 2.5 Hz, 1H), 2.86 (s, 3H). <sup>13</sup>C NMR (151 MHz, CDCl<sub>3</sub>) δ 158.8 (d, <sup>1</sup>*J*<sub>CF</sub> = 242.9 Hz), 146.2, 140.9, 133.2, 131.3, 130.6 (d, *J*<sub>CF</sub> = 7.2 Hz), 119.5 (d, <sup>2</sup>*J*<sub>CF</sub> = 27.4 Hz), 118.7 (d, *J*<sub>CF</sub> = 9.1 Hz), 115.3 (d, *J*<sub>CF</sub> = 11.9 Hz), 103.4 (d, <sup>2</sup>*J*<sub>CF</sub> = 25.3 Hz), 15.4. HRMS (ESI): calculated for C<sub>11</sub>H<sub>9</sub>FN<sub>3</sub> [M+H]<sup>+</sup> 202.0775, found 202.0775.

### 9-chloro-4-methylpyrazino[1,2-*b*]indazole (3da)

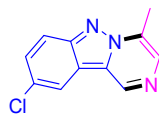

Yield 52%, orange solid; mp: 153-156 °C; <sup>1</sup>H NMR (600 MHz, CDCl<sub>3</sub>) δ 9.40 (s, 1H), 8.19 – 8.14 (m, 2H), 7.93 (d, *J* = 9.0 Hz, 1H), 7.58 (dd, *J* = 9.1, 2.0 Hz, 1H), 2.89 (s, 3H). <sup>13</sup>C NMR (151 MHz, CDCl<sub>3</sub>) δ 147.5, 140.9, 133.6, 131.4, 130.2, 130.0, 128.2, 118.8, 118.3, 116.2, 15.5. HRMS (ESI): calculated for C<sub>11</sub>H<sub>9</sub>ClN<sub>3</sub> [M+H]<sup>+</sup> 218.0480, found 218.0479.

### 8-chloro-4-methylpyrazino[1,2-*b*]indazole (3ea)

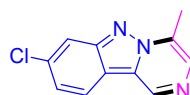

Yield 79%, white solid; mp: 155-158 °C; <sup>1</sup>H NMR (600 MHz, CDCl<sub>3</sub>) δ 9.37 (s, 1H), 8.16 (s, 1H), 8.06 (d, *J* = 8.7 Hz, 1H), 7.93 (d, *J* = 1.8 Hz, 1H), 7.31 (dd, *J* = 8.7, 1.8 Hz, 1H), 2.87 (s, 3H). <sup>13</sup>C NMR (151 MHz, CDCl<sub>3</sub>) δ 149.5, 140.5, 134.9, 133.5, 131.5, 130.4, 123.7, 120.8, 116.1, 113.9, 15.4. HRMS (ESI): calculated for C<sub>11</sub>H<sub>9</sub>ClN<sub>3</sub> [M+H]<sup>+</sup> 218.0480, found 218.0480.

#### 9-bromo-4-methylpyrazino[1,2-*b*]indazole (3fa)

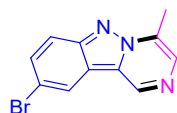

Yield 52%, red solid; mp: 148-151 °C; <sup>1</sup>H NMR (600 MHz, CDCl<sub>3</sub>) δ 9.38 (s, 1H), 8.30 (d, *J* = 1.9 Hz, 1H), 8.18 (s, 1H), 7.85 (d, *J* = 9.0 Hz, 1H), 7.68 (dd, *J* = 9.0, 1.9 Hz, 1H), 2.88 (s, 3H). <sup>13</sup>C NMR (151 MHz, CDCl<sub>3</sub>) δ 147.6, 140.8, 133.7, 132.5, 131.4, 129.7, 122.1, 118.5, 116.9, 115.7, 15.5. HRMS (ESI): calculated for C<sub>11</sub>H<sub>9</sub>BrN<sub>3</sub> [M+H]<sup>+</sup> 261.9974, found 261.9976.

#### 8-bromo-4-methylpyrazino[1,2-*b*]indazole (3ga)

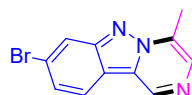

Yield 48%, brown solid; mp: 146-149 °C; <sup>1</sup>H NMR (600 MHz, CDCl<sub>3</sub>) δ 9.40 (s, 1H), 8.19 (s, 1H), 8.14 (d, *J* = 1.7 Hz, 1H), 8.03 (d, *J* = 8.6 Hz, 1H), 7.46 (dd, *J* = 8.7, 1.6 Hz, 1H), 2.88 (s, 3H). <sup>13</sup>C NMR (151 MHz, CDCl<sub>3</sub>) δ 149.9, 140.6, 133.7, 131.5, 130.5, 126.1, 123.1, 120.9, 119.4, 114.2, 15.5. HRMS (ESI): calculated for C<sub>11</sub>H<sub>9</sub>BrN<sub>3</sub> [M+H]<sup>+</sup> 261.9974, found 261.9976.

#### 9-iodo-4-methylpyrazino[1,2-*b*]indazole (3ha)

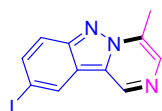

Yield 44%, red solid; mp: 150-153 °C; <sup>1</sup>H NMR (600 MHz, CDCl<sub>3</sub>) δ 9.38 (s, 1H), 8.55 (d, *J* = 1.5 Hz, 1H), 8.18 (s, 1H), 7.84 (dd, *J* = 8.9, 1.6 Hz, 1H), 7.75 (d, *J* = 8.9 Hz, 1H), 2.88 (s, 3H). <sup>13</sup>C NMR (151 MHz, CDCl<sub>3</sub>) δ 147.9, 140.8, 137.6, 133.7, 131.4, 129.3, 128.6, 118.7, 117.8, 86.1, 15.5. HRMS (ESI): calculated for C<sub>11</sub>H<sub>8</sub>IN<sub>3</sub> [M]<sup>+</sup> 309.9763, found 308.9719.

#### 4-methyl-9-nitropyrazino[1,2-*b*]indazole (3ia)

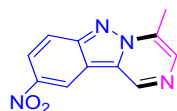

Yield 49%, yellow solid; mp: 225-228 °C; <sup>1</sup>H NMR (600 MHz, CDCl<sub>3</sub>) δ 9.61 (s, 1H), 9.24 (s, 1H), 8.54 – 8.29 (m, 2H), 8.04 (s, 1H), 2.96 (s, 3H). <sup>13</sup>C NMR (151 MHz, CDCl<sub>3</sub>) δ 150.7, 142.8, 140.9, 135.4, 132.5, 132.1, 123.7, 118.2, 117.4, 114.3, 15.4. HRMS (ESI): calculated for C<sub>11</sub>H<sub>9</sub>N<sub>4</sub>O<sub>2</sub> [M+H]<sup>+</sup> 229.0720, found 229.0721.

#### 8-bromo-9-chloro-4-methylpyrazino[1,2-*b*]indazole (3ja)



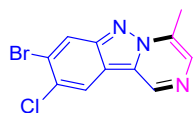

Yield 53%, red solid; mp: 80-83 °C;  $^1\text{H}$  NMR (600 MHz,  $\text{CDCl}_3$ )  $\delta$  9.38 (s, 1H), 8.27 (s, 1H), 8.22 (d,  $J = 1.2$  Hz, 1H), 8.09 (s, 1H), 2.88 (s, 3H).  $^{13}\text{C}$  NMR (151 MHz,  $\text{CDCl}_3$ )  $\delta$  148.4, 140.8, 135.1, 134.2, 131.7, 129.7, 124.3, 117.9, 116.3, 115.3, 15.5. HRMS (ESI): calculated for  $\text{C}_{11}\text{H}_7\text{BrClN}_3$   $[\text{M}]^+$  294.9506, found 294.9527.

#### 8,9-dichloro-4-methylpyrazino[1,2-b]indazole (3ka)

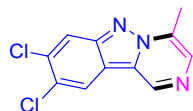

Yield 69%, red solid; mp: 106-109 °C;  $^1\text{H}$  NMR (600 MHz,  $\text{CDCl}_3$ )  $\delta$  9.39 (s, 1H), 8.29 (s, 1H), 8.22 (d,  $J = 1.1$  Hz, 1H), 8.10 (s, 1H), 2.89 (t,  $J = 0.8$  Hz, 3H).  $^{13}\text{C}$  NMR (151 MHz,  $\text{CDCl}_3$ )  $\delta$  147.9, 140.8, 134.2, 133.7, 131.7, 129.9, 126.9, 120.7, 118.1, 114.7, 15.5. HRMS (ESI): calculated for  $\text{C}_{11}\text{H}_8\text{Cl}_2\text{N}_3$   $[\text{M}+\text{H}]^+$  252.0090, found 252.0087.

#### 8,9-difluoro-4-methylpyrazino[1,2-b]indazole (3la)

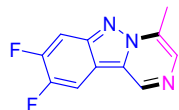

Yield 51%, red solid; mp: 156-159 °C;  $^1\text{H}$  NMR (600 MHz,  $\text{CDCl}_3$ )  $\delta$  9.37 (s, 1H), 8.17 (s, 1H), 7.92 (dd,  $J = 9.3, 7.5$  Hz, 1H), 7.72 (dd,  $J = 10.4, 6.8$  Hz, 1H), 2.89 (s, 3H).  $^{13}\text{C}$  NMR (151 MHz,  $\text{CDCl}_3$ )  $\delta$  152.9 (dd,  $J_{\text{CF}} = 16.2, 252.1$  Hz), 148.6 (dd,  $J_{\text{CF}} = 16.6, 246.9$  Hz), 145.5 (d,  $J_{\text{CF}} = 11.7$  Hz), 140.6, 133.1, 131.5, 130.7 (d,  $J_{\text{CF}} = 7.5$  Hz), 110.8 (d,  $J_{\text{CF}} = 9.2$  Hz), 105.7 (d,  $J_{\text{CF}} = 21.0$  Hz), 103.5 (d,  $J_{\text{CF}} = 20.5$  Hz), 15.4. HRMS (ESI): calculated for  $\text{C}_{11}\text{H}_8\text{F}_2\text{N}_3$   $[\text{M}+\text{H}]^+$  220.0681, found 220.0680.

#### 8-chloro-9-fluoro-4-methylpyrazino[1,2-b]indazole (3ma)

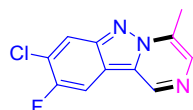

Yield 45%, red solid; mp: 130-133 °C;  $^1\text{H}$  NMR (600 MHz,  $\text{CDCl}_3$ )  $\delta$  9.38 (s, 1H), 8.19 (d,  $J = 1.2$  Hz, 1H), 8.06 (d,  $J = 6.2$  Hz, 1H), 7.90 (d,  $J = 8.3$  Hz, 1H), 2.89 (s, 3H).  $^{13}\text{C}$  NMR (151 MHz,  $\text{CDCl}_3$ )  $\delta$  154.1 (d,  $J_{\text{CF}} = 245.2$  Hz), 145.9, 140.9, 133.7, 131.6, 130.7 (d,  $J_{\text{CF}} = 6.6$  Hz), 124.9 (d,  $J_{\text{CF}} = 21$  Hz), 118.4, 113.7 (d,  $J_{\text{CF}} = 9.0$  Hz), 104.9 (d,  $J_{\text{CF}} = 25.1$  Hz), 15.4. HRMS (ESI): calculated for  $\text{C}_{11}\text{H}_8\text{ClFN}_3$   $[\text{M}+\text{H}]^+$  236.0385, found 236.0385.

#### 4,7-dimethylpyrazino[1,2-b]indazole (3na)

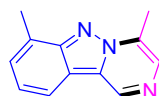

Yield 77%, red solid; mp: 102-105 °C;  $^1\text{H}$  NMR (600 MHz,  $\text{CDCl}_3$ )  $\delta$  9.25 (s, 1H), 7.98 (s, 1H), 7.86 (d,  $J = 8.1$  Hz, 1H), 7.27 (s, 1H), 7.17 (t,  $J = 7.6$  Hz, 1H), 2.77 (s, 3H), 2.67 (s, 3H).  $^{13}\text{C}$  NMR (151 MHz,

CDCl<sub>3</sub>)  $\delta$  149.2, 140.7, 132.6, 131.3, 130.7, 128.2, 127.2, 122.7, 116.9, 115.4, 17.4, 15.4. HRMS (ESI): calculated for C<sub>12</sub>H<sub>12</sub>N<sub>3</sub> [M+H]<sup>+</sup> 198.1026, found 198.1024.

#### 4,9-dimethylpyrazino[1,2-*b*]indazole (30a)

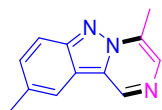

Yield 64%, red solid; mp: 115-118 °C; <sup>1</sup>H NMR (600 MHz, CDCl<sub>3</sub>)  $\delta$  9.37 (s, 1H), 8.09 (s, 1H), 7.94 (s, 1H), 7.90 (d, *J* = 8.7 Hz, 1H), 7.48 (dd, *J* = 8.7, 1.7 Hz, 1H), 2.87 (s, 3H), 2.57 (s, 3H). <sup>13</sup>C NMR (151 MHz, CDCl<sub>3</sub>)  $\delta$  148.0, 140.7, 132.7, 132.4, 131.6, 131.0, 130.0, 118.3, 116.5, 115.9, 22.0, 15.5. HRMS (ESI): calculated for C<sub>12</sub>H<sub>12</sub>N<sub>3</sub> [M+H]<sup>+</sup> 198.1026, found 198.1024.

#### 9-methoxy-4-methylpyrazino[1,2-*b*]indazole (3pa)

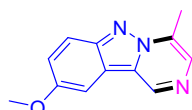

Yield 41%, brown solid; mp: 133-136 °C; <sup>1</sup>H NMR (600 MHz, CDCl<sub>3</sub>)  $\delta$  9.35 (s, 1H), 8.04 (s, 1H), 7.91 (d, *J* = 9.2 Hz, 1H), 7.43 (d, *J* = 2.5 Hz, 1H), 7.32 (dd, *J* = 9.2, 2.5 Hz, 1H), 3.95 (s, 3H), 2.85 (s, 3H). <sup>13</sup>C NMR (151 MHz, CDCl<sub>3</sub>)  $\delta$  156.0, 145.4, 140.9, 132.2, 131.1, 130.1, 122.7, 118.3, 115.9, 97.5, 55.8, 15.4. HRMS (ESI): calculated for C<sub>12</sub>H<sub>12</sub>N<sub>3</sub>O [M+H]<sup>+</sup> 214.0975, found 214.0976.

#### 7-methylpyrazolo[1,5-*a*]pyrazin (3qa)

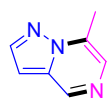

Yield 56%, pale yellow oil; <sup>1</sup>H NMR (600 MHz, DMSO-*d*<sub>6</sub>)  $\delta$  9.17 (s, 1H), 8.27 (d, *J* = 6 Hz, 1H), 7.90 (s, 1H), 7.09 (s, *J* = 6 Hz, 1H), 2.73 (s, 3H). <sup>13</sup>C NMR (125 MHz, DMSO-*d*<sub>6</sub>)  $\delta$  142.9, 142.1, 135.6, 131.8, 128.2, 99.7, 14.7. MS (EI): *m/z* calculated for C<sub>7</sub>H<sub>7</sub>N<sub>3</sub> 133, found 133.

#### 4-benzylpyrazino[1,2-*b*]indazole (3ab)

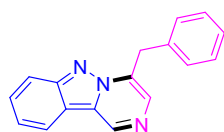

Yield 50%, gray solid; mp: 130-133 °C; <sup>1</sup>H NMR (600 MHz, CDCl<sub>3</sub>)  $\delta$  9.45 (s, 1H), 8.20 (d, *J* = 8.2 Hz, 1H), 8.03 (d, *J* = 8.6 Hz, 1H), 7.94 (s, 1H), 7.66 (t, *J* = 7.7 Hz, 1H), 7.47 – 7.40 (m, 3H), 7.37 (t, *J* = 7.5 Hz, 2H), 7.31 (t, *J* = 7.4 Hz, 1H), 4.66 (s, 2H). <sup>13</sup>C NMR (151 MHz, CDCl<sub>3</sub>)  $\delta$  149.2, 140.8, 135.4, 134.0, 133.1, 130.6, 129.7, 129.1, 128.9, 127.4, 122.7, 119.6, 117.0, 115.8, 35.2. HRMS (ESI): calculated for C<sub>17</sub>H<sub>14</sub>N<sub>3</sub> [M+H]<sup>+</sup> 260.1182, found 260.1180.

#### 4-(2-methylbenzyl)pyrazino[1,2-*b*]indazole (3ac)

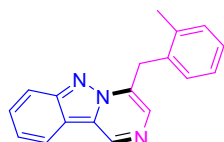

Yield 28%, red solid; mp: 118-121 °C; <sup>1</sup>H NMR (600 MHz, CDCl<sub>3</sub>) δ 9.46 (s, 1H), 8.23 (d, *J* = 8.2 Hz, 1H), 8.05 (d, *J* = 8.6 Hz, 1H), 7.71-7.67 (m, 2H), 7.45 (t, *J* = 7.5 Hz, 1H), 7.29-7.21 (m, 4H), 4.66 (s, 2H), 2.32 (s, 3H). <sup>13</sup>C NMR (151 MHz, CDCl<sub>3</sub>) δ 149.3, 140.6, 137.4, 133.3, 132.7, 130.9, 130.6, 130.5, 129.2, 127.9, 126.7, 122.8, 119.7, 117.0, 115.9, 33.1, 19.6. HRMS (ESI): calculated for C<sub>18</sub>H<sub>16</sub>N<sub>3</sub> [M+H]<sup>+</sup> 274.1339, found 274.1340.

#### 4-(4-methylbenzyl)pyrazino[1,2-*b*]indazole (3ad)

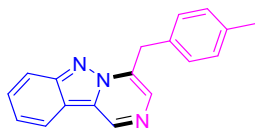

Yield 35%, white solid; mp: 138-141 °C; <sup>1</sup>H NMR (600 MHz, CDCl<sub>3</sub>) δ 9.46 (s, 1H), 8.22 (d, *J* = 8.2 Hz, 1H), 8.03 (d, *J* = 8.6 Hz, 1H), 7.94 (s, 1H), 7.67 (t, *J* = 7.7 Hz, 1H), 7.43 (t, *J* = 7.5 Hz, 1H), 7.32 (d, *J* = 7.6 Hz, 2H), 7.18 (d, *J* = 7.5 Hz, 2H), 4.63 (s, 2H), 2.36 (s, 3H). <sup>13</sup>C NMR (151 MHz, CDCl<sub>3</sub>) δ 149.2, 140.8, 137.1, 134.2, 133.2, 132.3, 130.5, 129.7, 129.6, 129.0, 122.6, 119.6, 117.0, 115.8, 34.8, 21.2. HRMS (ESI): calculated for C<sub>18</sub>H<sub>16</sub>N<sub>3</sub> [M+H]<sup>+</sup> 274.1339, found 274.1341.

#### 4-(3-methylbenzyl)pyrazino[1,2-*b*] indazole (3ae)

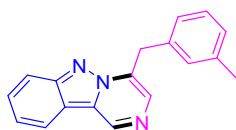

Yield 47%, red solid; mp: 185-188 °C; <sup>1</sup>H NMR (600 MHz, CDCl<sub>3</sub>) δ 9.46 (s, 1H), 8.21 (d, *J* = 8.2 Hz, 1H), 8.04 (d, *J* = 8.6 Hz, 1H), 7.94 (s, 1H), 7.67 (s, 1H), 7.43 (s, 1H), 7.23 (s, 3H), 7.13 (s, 1H), 4.63 (s, 2H), 2.35 (s, 3H). <sup>13</sup>C NMR (151 MHz, CDCl<sub>3</sub>) δ 149.2, 140.8, 138.6, 135.3, 134.2, 133.2, 130.5, 129.1, 128.8, 128.2, 126.8, 122.7, 119.7, 117.1, 115.8, 35.1, 21.5. HRMS (ESI): calculated for C<sub>18</sub>H<sub>16</sub>N<sub>3</sub> [M+H]<sup>+</sup> 274.1339, found 274.1337.

#### 4-(4-methoxybenzyl)pyrazino[1,2-*b*]indazole (3af)

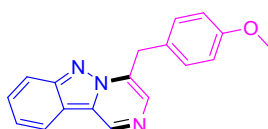

Yield 47%, gray solid; mp: 112-115 °C; <sup>1</sup>H NMR (600 MHz, CDCl<sub>3</sub>) δ 9.43 (s, 1H), 8.20 (d, *J* = 8.2 Hz, 1H), 8.03 (d, *J* = 8.6 Hz, 1H), 7.92 (s, 1H), 7.66 (t, *J* = 7.7 Hz, 1H), 7.42 (t, *J* = 7.5 Hz, 1H), 7.35 (d, *J* = 8.3 Hz, 2H), 6.93 – 6.88 (m, 2H), 4.59 (s, 2H), 3.80 (s, 3H). <sup>13</sup>C NMR (151 MHz, CDCl<sub>3</sub>) δ 159.0, 149.2, 140.7, 134.4, 133.0, 130.8, 130.5, 129.0, 127.3, 122.7, 119.6, 117.0, 115.8, 114.4, 55.4, 34.4. HRMS (ESI): calculated for C<sub>18</sub>H<sub>16</sub>N<sub>3</sub>O [M+H]<sup>+</sup> 290.1288, found 290.1296.

#### 4-methyl-3-phenylpyrazino[1,2-*b*]indazole (3ag)

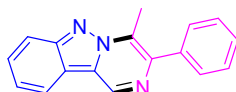

Yield 67%, red solid; mp: 191-194 °C; <sup>1</sup>H NMR (600 MHz, CDCl<sub>3</sub>) δ 9.48 (s, 1H), 8.20 (d, *J* = 8.2 Hz, 1H), 8.01 (d, *J* = 8.6 Hz, 1H), 7.66 (t, *J* = 5.9 Hz, 2H), 7.63 (d, *J* = 7.1 Hz, 1H), 7.52 (t, *J* = 7.6 Hz, 2H), 7.46 (t, *J* = 7.4 Hz, 1H), 7.40 (t, *J* = 7.5 Hz, 1H), 2.99 (s, 3H). <sup>13</sup>C NMR (151 MHz, CDCl<sub>3</sub>) δ 149.6, 143.7, 139.3, 138.2, 130.0, 129.4, 129.0, 128.9, 128.6, 128.5, 122.5, 119.6, 116.7, 115.8, 15.6. HRMS (ESI): calculated for C<sub>17</sub>H<sub>14</sub>N<sub>3</sub> [M+H]<sup>+</sup> 260.1182, found 260.1182.

#### 4-methyl-3-(*o*-tolyl)pyrazino[1,2-*b*]indazole (3ah)

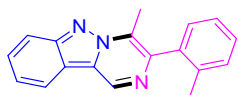

Yield 45%, yellow oil; mp: 100-103 °C; <sup>1</sup>H NMR (600 MHz, CDCl<sub>3</sub>) δ 9.51 (s, 1H), 8.24 (d, *J* = 8.2 Hz, 1H), 8.04 (d, *J* = 8.6 Hz, 1H), 7.67 (t, *J* = 7.7 Hz, 1H), 7.46 – 7.41 (m, 1H), 7.41 – 7.29 (m, 4H), 2.78 (s, 3H), 2.19 (s, 3H), 1.32 – 1.24 (m, 1H). <sup>13</sup>C NMR (151 MHz, CDCl<sub>3</sub>) δ 148.4, 142.7, 138.1, 136.4, 135.7, 129.5, 128.8, 128.5, 128.4, 127.9, 127.8, 124.9, 121.5, 118.5, 115.7, 114.8, 18.7, 13.8. HRMS (ESI): calculated for C<sub>18</sub>H<sub>16</sub>N<sub>3</sub> [M+H]<sup>+</sup> 274.1339, found 274.1336.

#### 4-methyl-3-(*p*-tolyl)pyrazino[1,2-*b*]indazole (3ai)

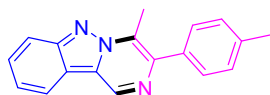

Yield 66%, white solid; mp: 160-163 °C; <sup>1</sup>H NMR (600 MHz, CDCl<sub>3</sub>) δ 9.50 (s, 1H), 8.22 (d, *J* = 8.2 Hz, 1H), 8.02 (d, *J* = 8.6 Hz, 1H), 7.66 (t, *J* = 7.7 Hz, 1H), 7.57 (d, *J* = 8.0 Hz, 2H), 7.42 (t, *J* = 7.5 Hz, 1H), 7.34 (d, *J* = 7.8 Hz, 2H), 3.01 (s, 3H), 2.45 (s, 3H). <sup>13</sup>C NMR (151 MHz, CDCl<sub>3</sub>) δ 149.6, 143.8, 139.3, 138.6, 135.3, 129.9, 129.4, 129.3, 128.9, 128.9, 122.5, 119.6, 116.8, 115.9, 21.5, 15.7. HRMS (ESI): calculated for C<sub>18</sub>H<sub>16</sub>N<sub>3</sub> [M+H]<sup>+</sup> 274.1339, found 274.1339.

#### 3-(4-fluorophenyl)-4-methylpyrazino[1,2-*b*]indazole (3aj)

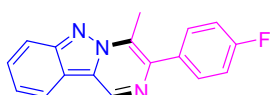

Yield 74%, yellow solid; mp: 191-194 °C; <sup>1</sup>H NMR (600 MHz, CDCl<sub>3</sub>) δ 9.49 (s, 1H), 8.23 (d, *J* = 8.1 Hz, 1H), 8.03 (d, *J* = 8.5 Hz, 1H), 7.66 (t, *J* = 9.3 Hz, 3H), 7.43 (t, *J* = 7.6 Hz, 1H), 7.23 (t, *J* = 8.4 Hz, 2H), 3.00 (s, 3H). <sup>13</sup>C NMR (151 MHz, CDCl<sub>3</sub>) δ 162.9 (d, <sup>1</sup>*J*<sub>CF</sub> = 247.5 Hz), 149.7, 142.7, 139.3, 134.1 (d, *J*<sub>CF</sub> = 4.5 Hz), 131.8 (d, *J*<sub>CF</sub> = 9.0 Hz), 129.5, 129.0 (d, *J*<sub>CF</sub> = 9.0 Hz), 122.7, 119.6, 116.9, 115.9, 115.7, 115.6, 15.6. HRMS (ESI): calculated for C<sub>17</sub>H<sub>13</sub>FN<sub>3</sub> [M+H]<sup>+</sup> 278.1088, found 278.1088.

#### 3-(4-chlorophenyl)-4-methylpyrazino[1,2-*b*]indazole (3ak)

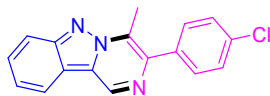

Yield 69%, white solid; mp: 207-210 °C; <sup>1</sup>H NMR (600 MHz, CDCl<sub>3</sub>) δ 9.47 (s, 1H), 8.21 (d, *J* = 8.2 Hz, 1H), 8.02 (d, *J* = 8.6 Hz, 1H), 7.69 – 7.64 (m, 1H), 7.62 (d, *J* = 8.1 Hz, 2H), 7.50 (d, *J* = 8.0 Hz, 2H), 7.42 (t, *J* = 7.5 Hz, 1H), 2.99 (s, 3H). <sup>13</sup>C NMR (151 MHz, CDCl<sub>3</sub>) δ 149.6, 142.5, 139.4, 136.6, 134.8,

131.4, 129.4, 129.1, 128.8, 122.7, 119.6, 116.8, 115.8, 15.6. HRMS (ESI): calculated for  $C_{17}H_{13}ClN_3$   
[M+H]<sup>+</sup> 294.0793, found 294.0792.

## **6. <sup>1</sup>H NMR and <sup>13</sup>C NMR Spectra of products**

**3aa**

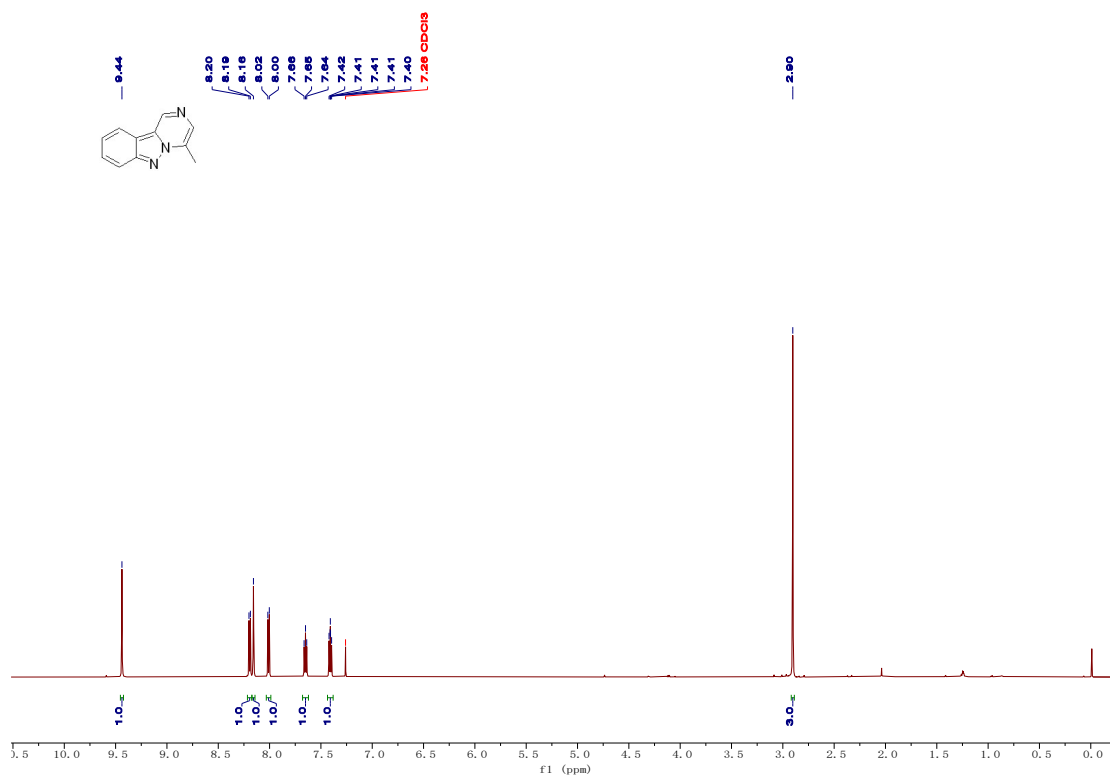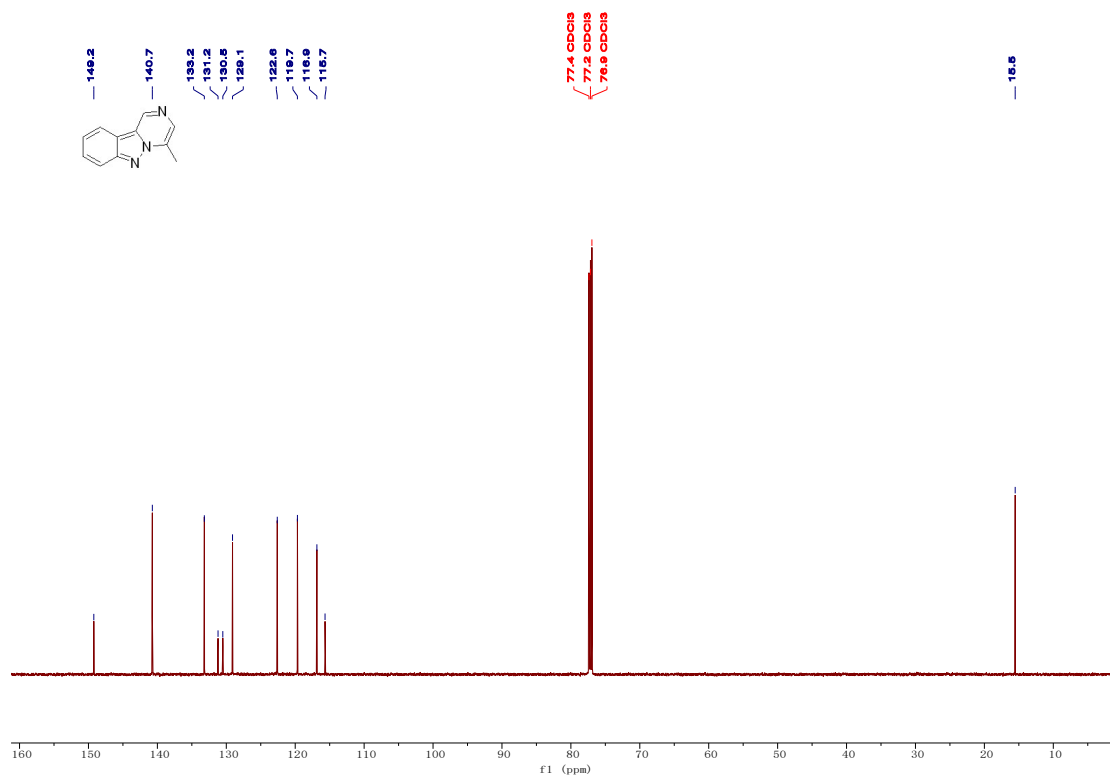

3ba

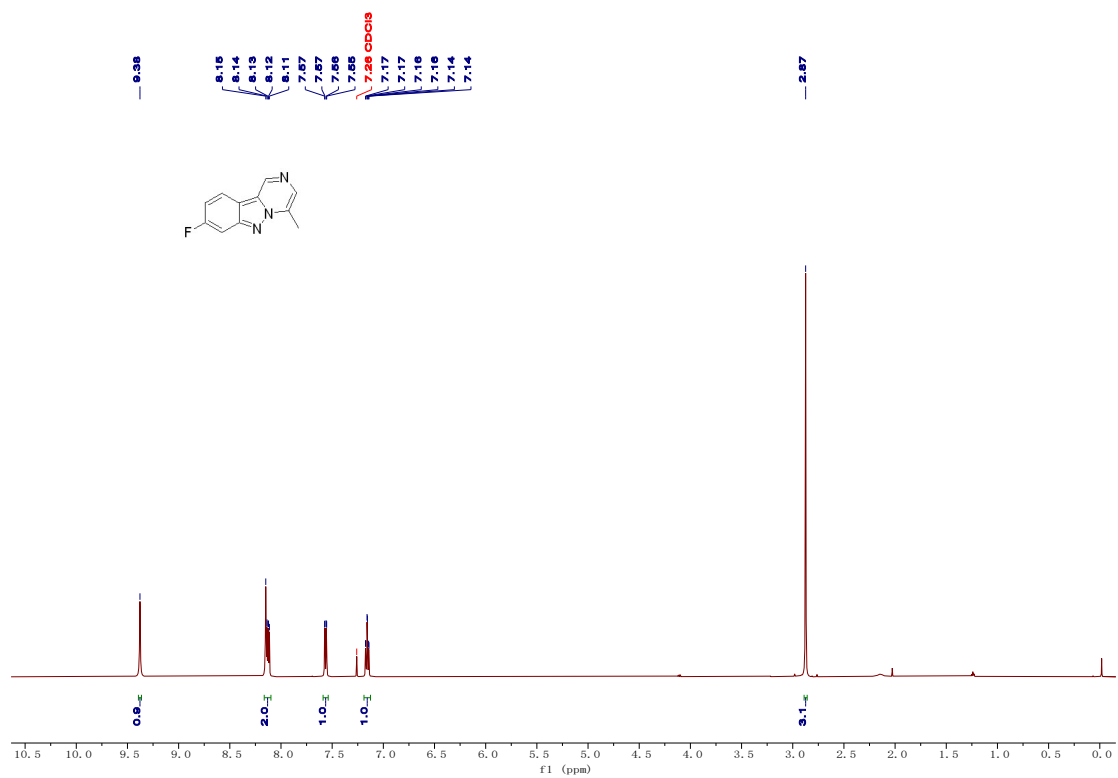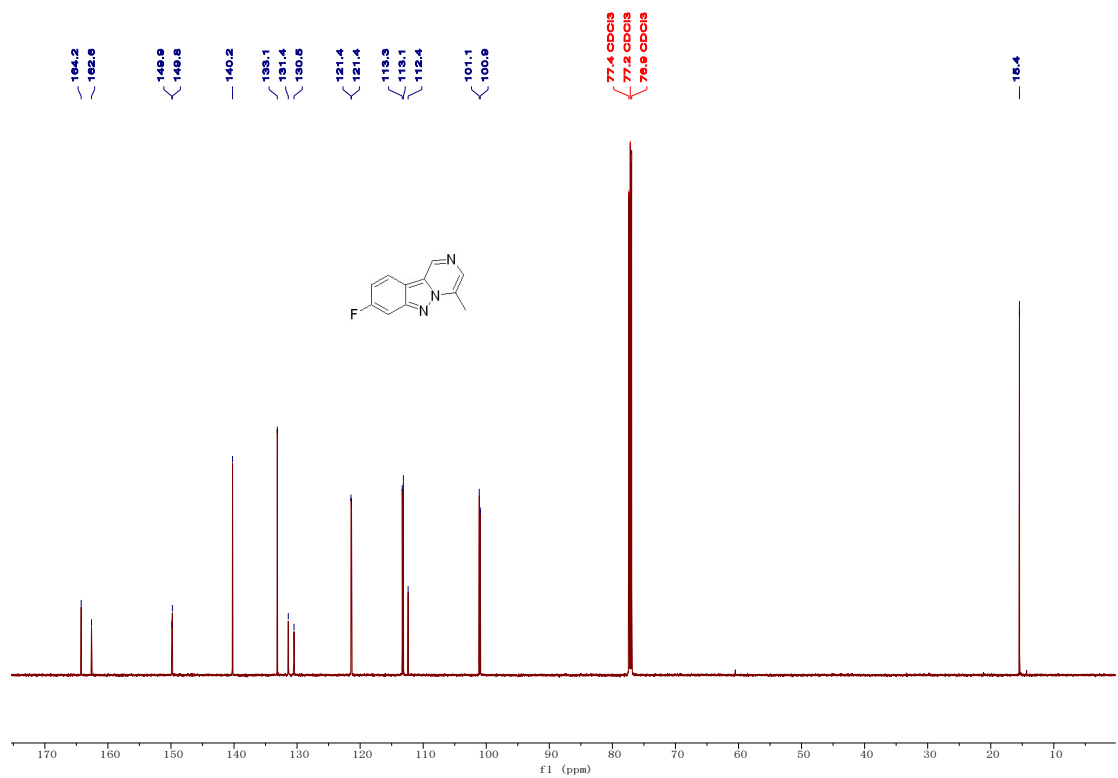

3ca

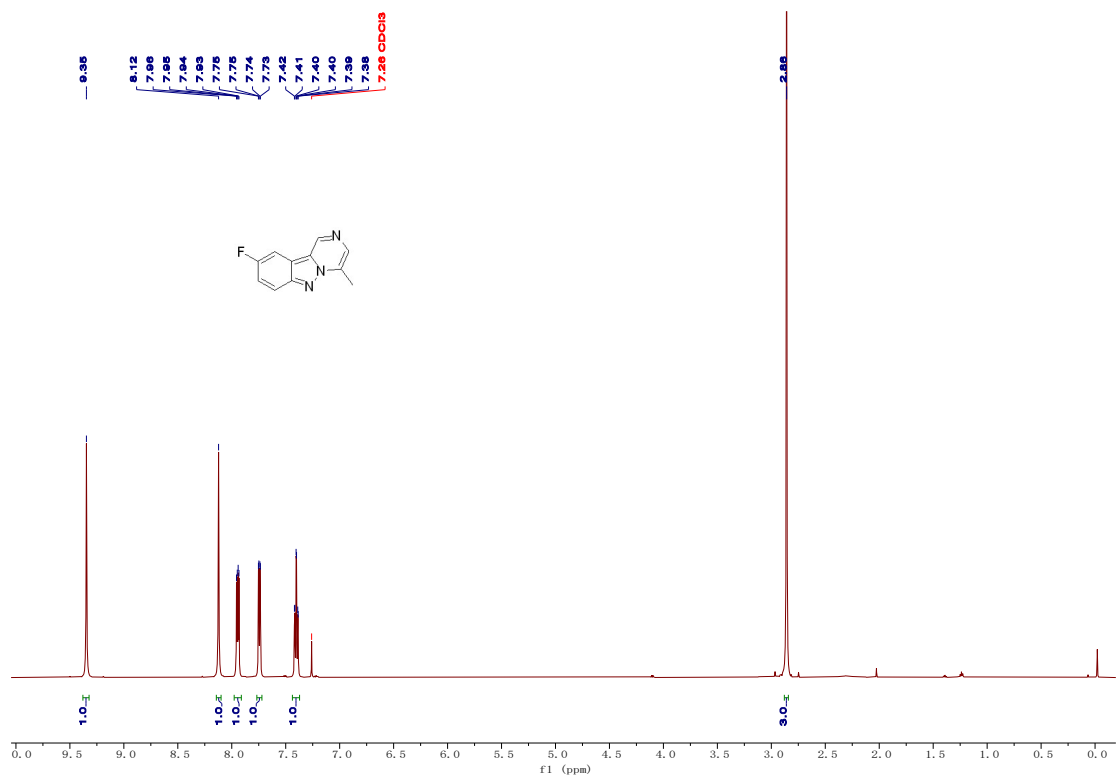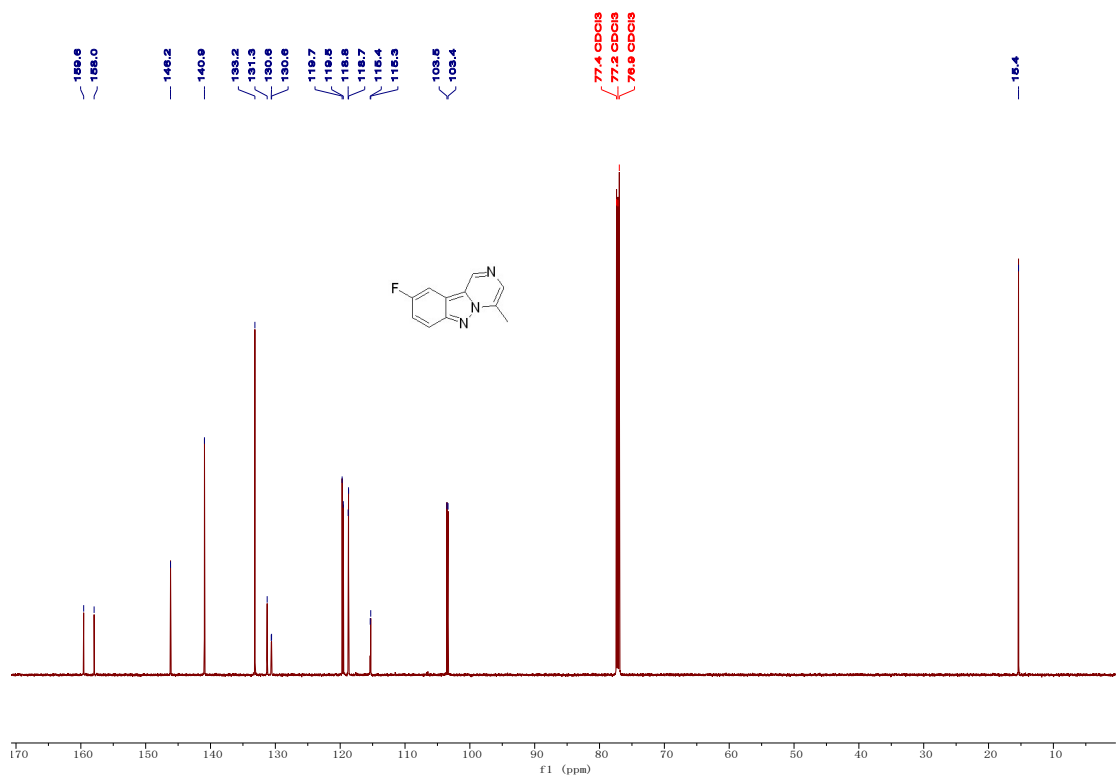

3da



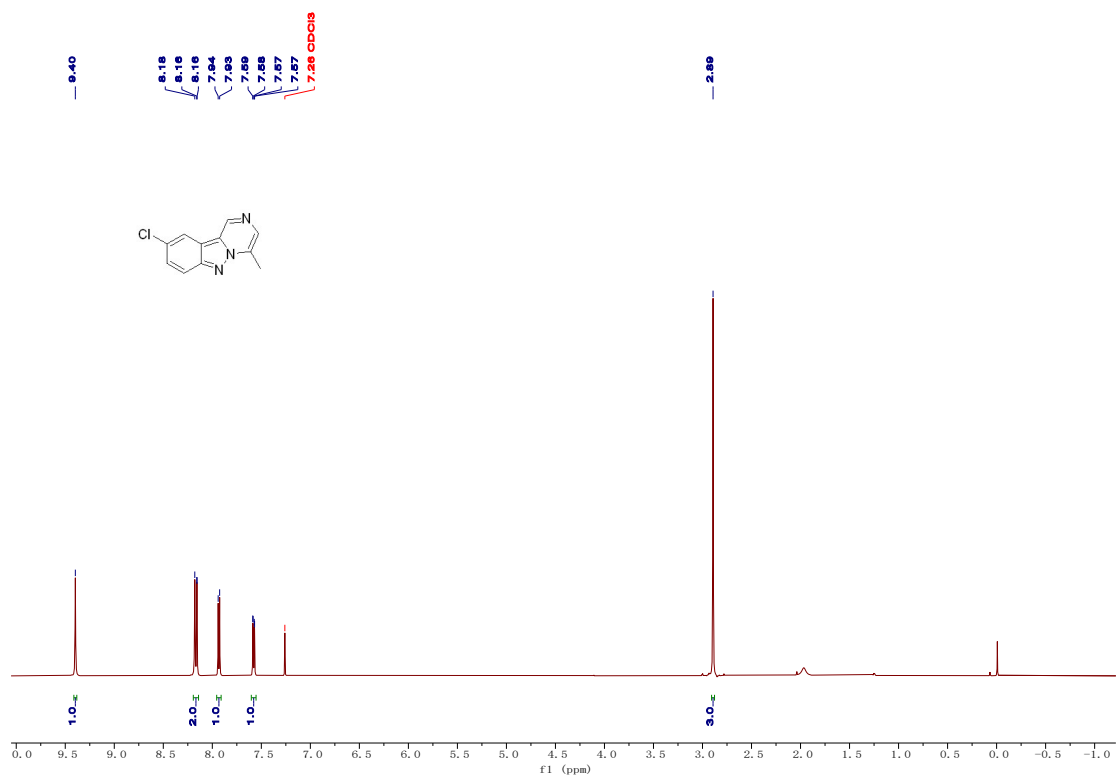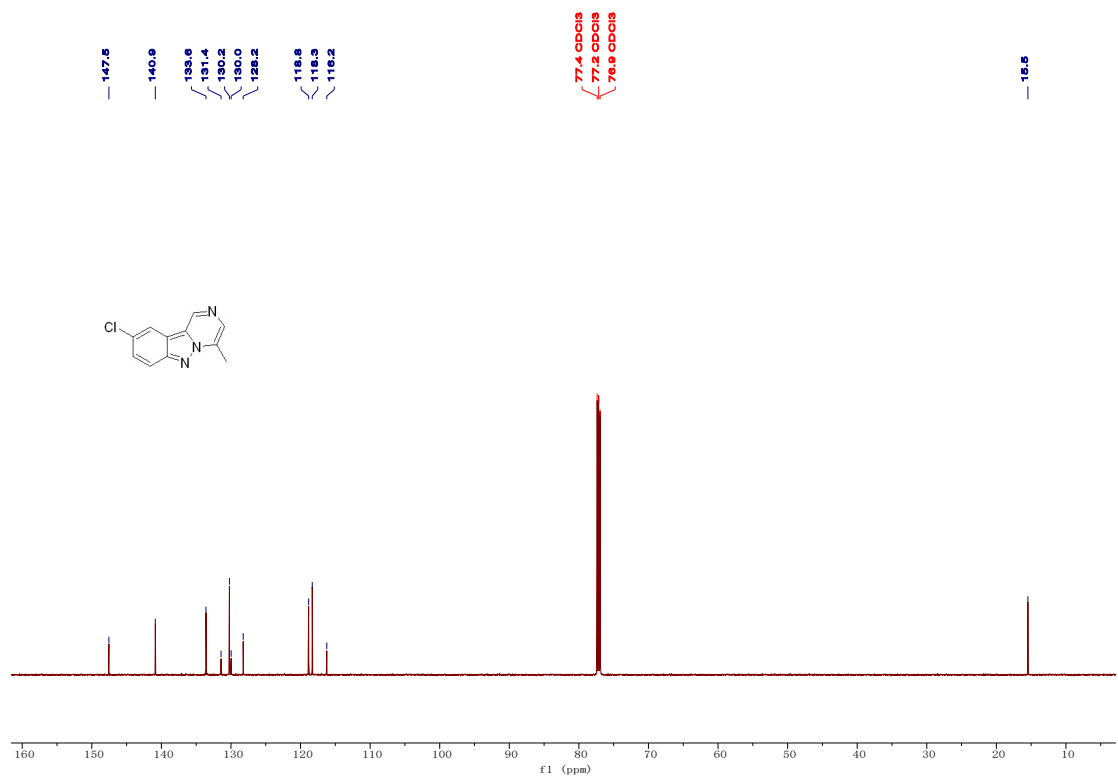

3a

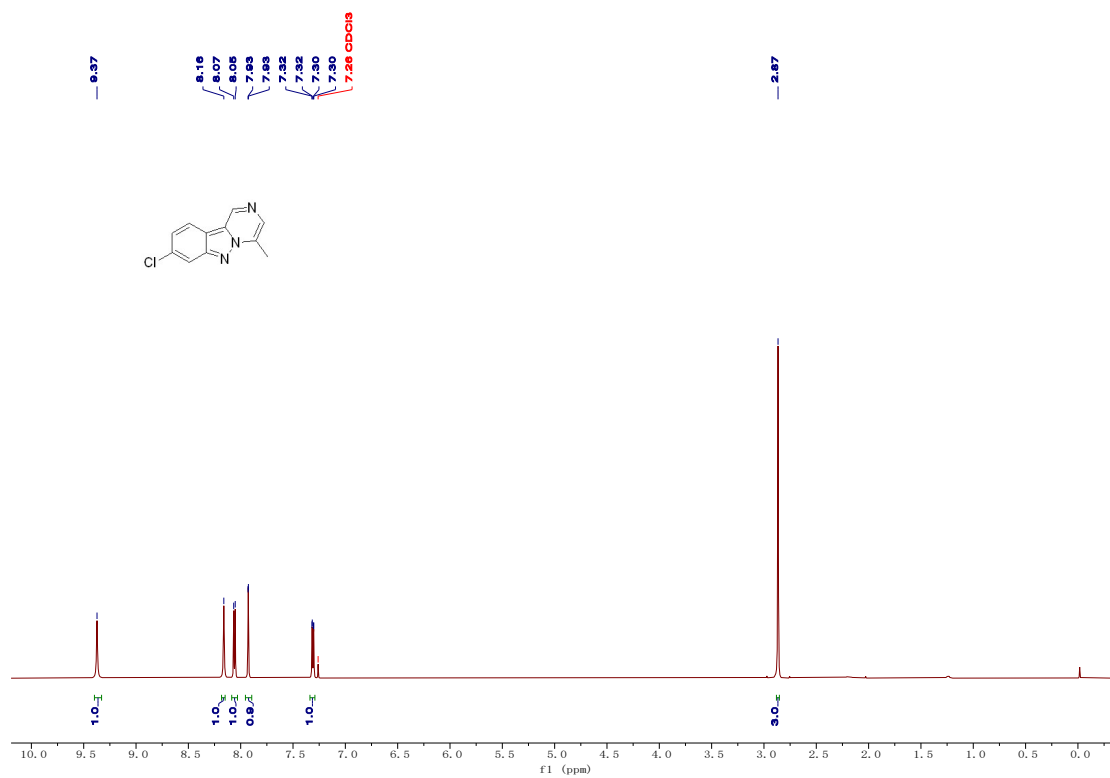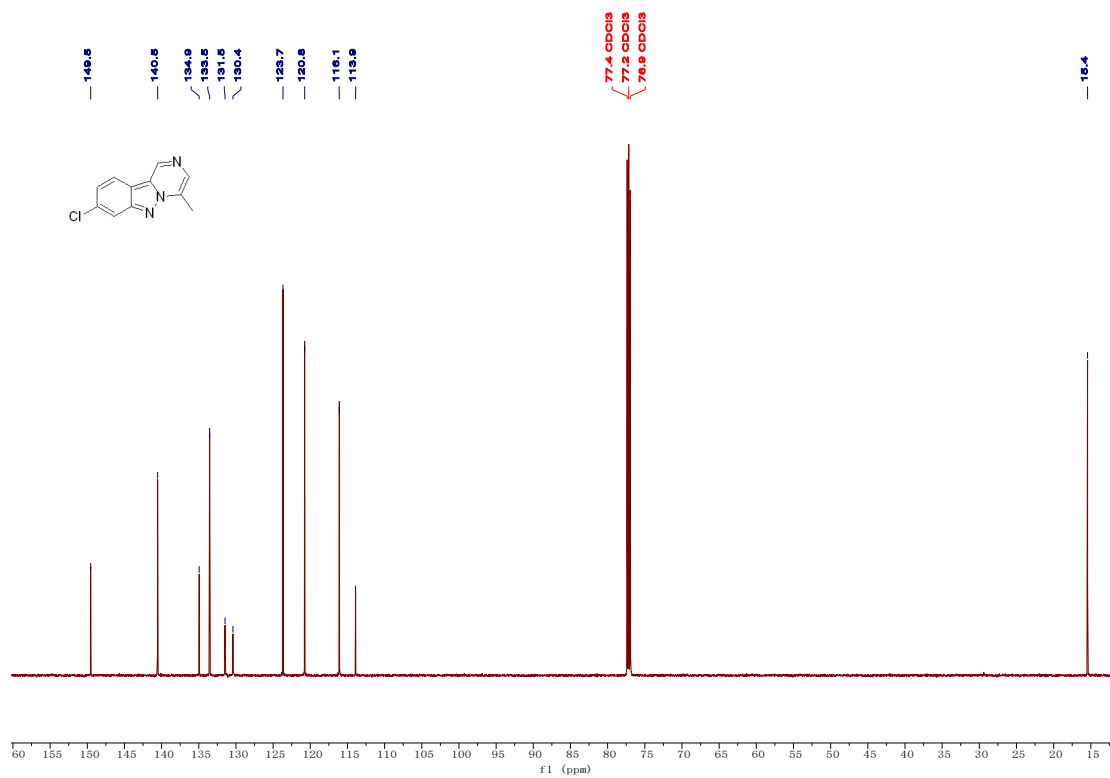

3fa

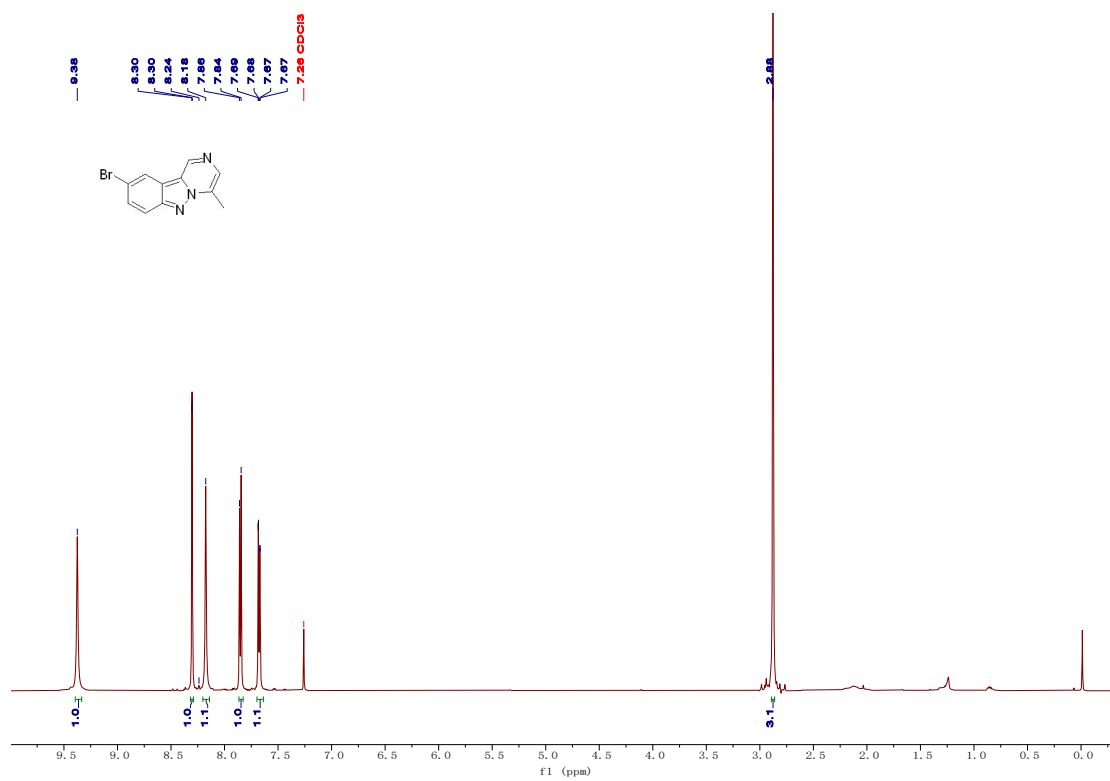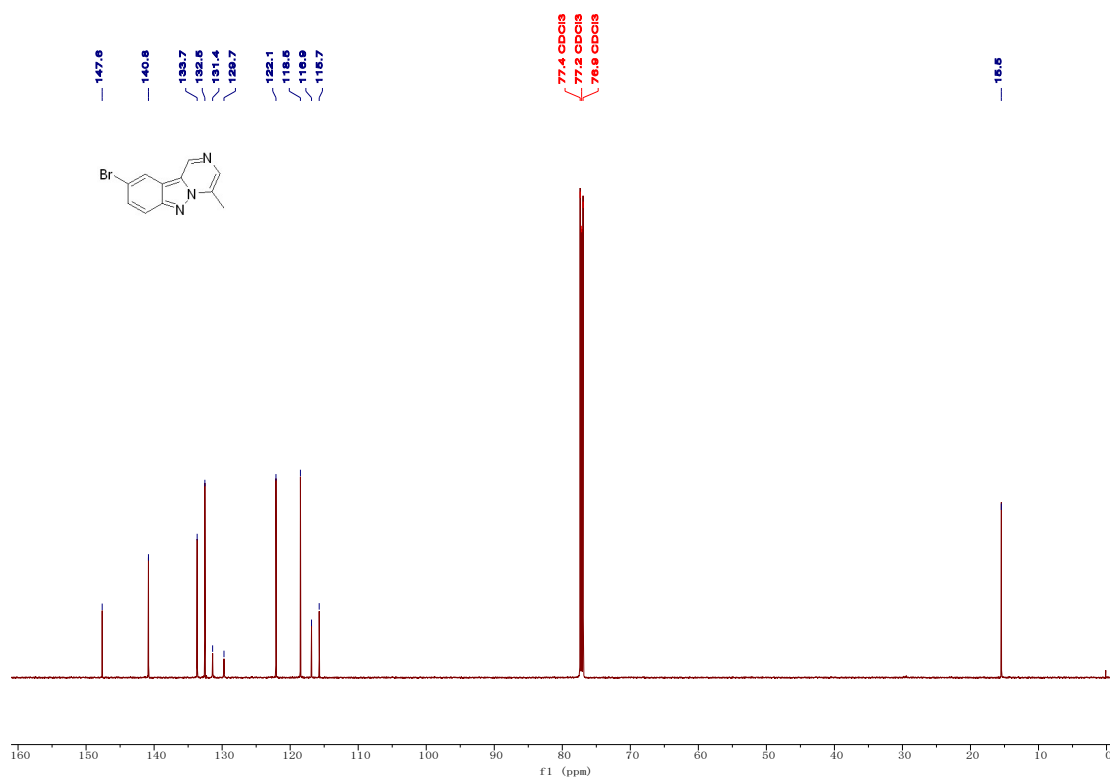

3ga

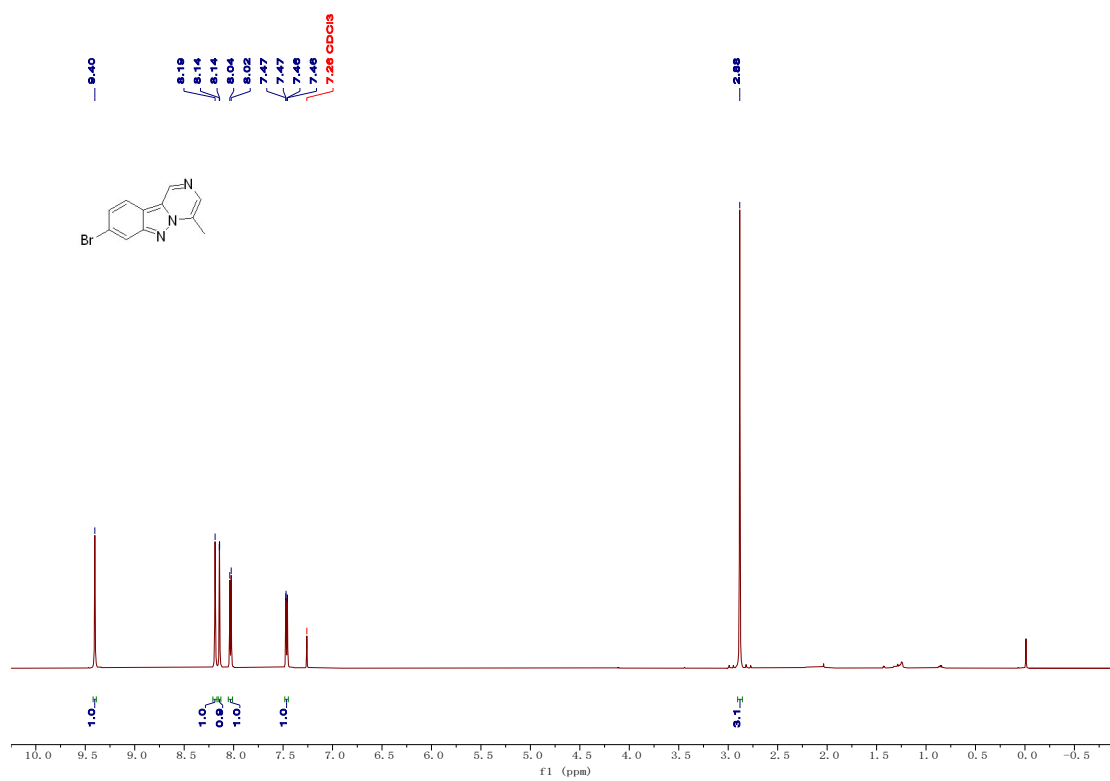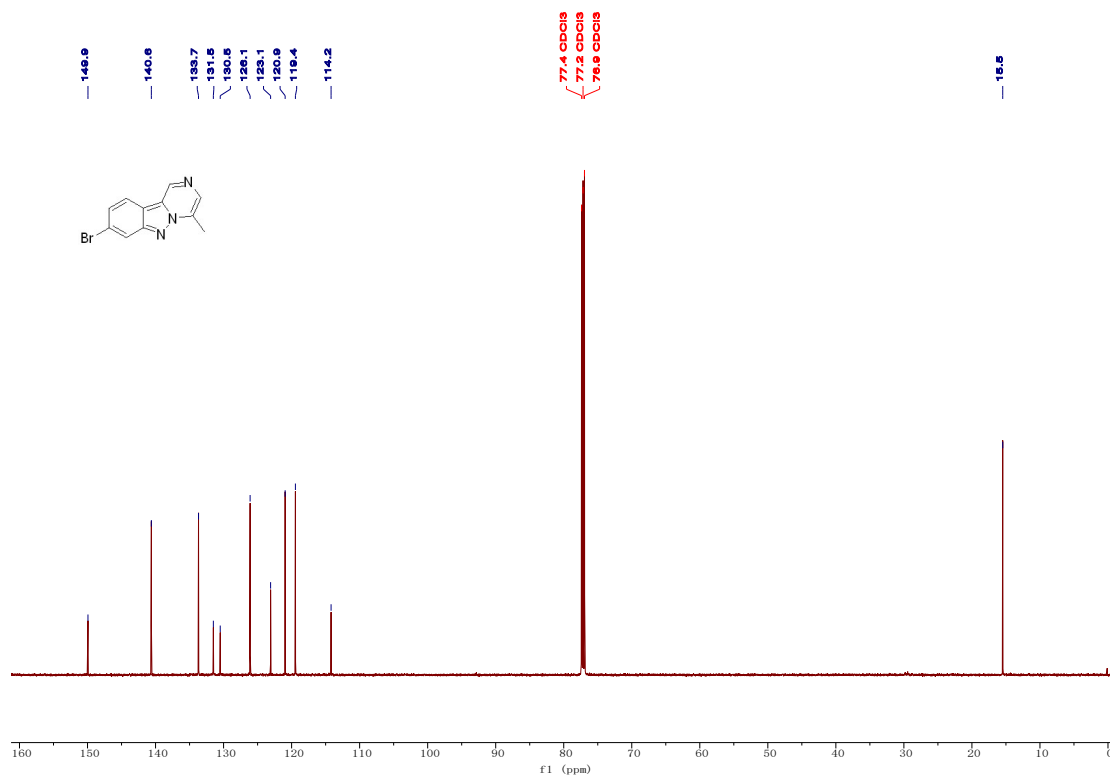

3ha

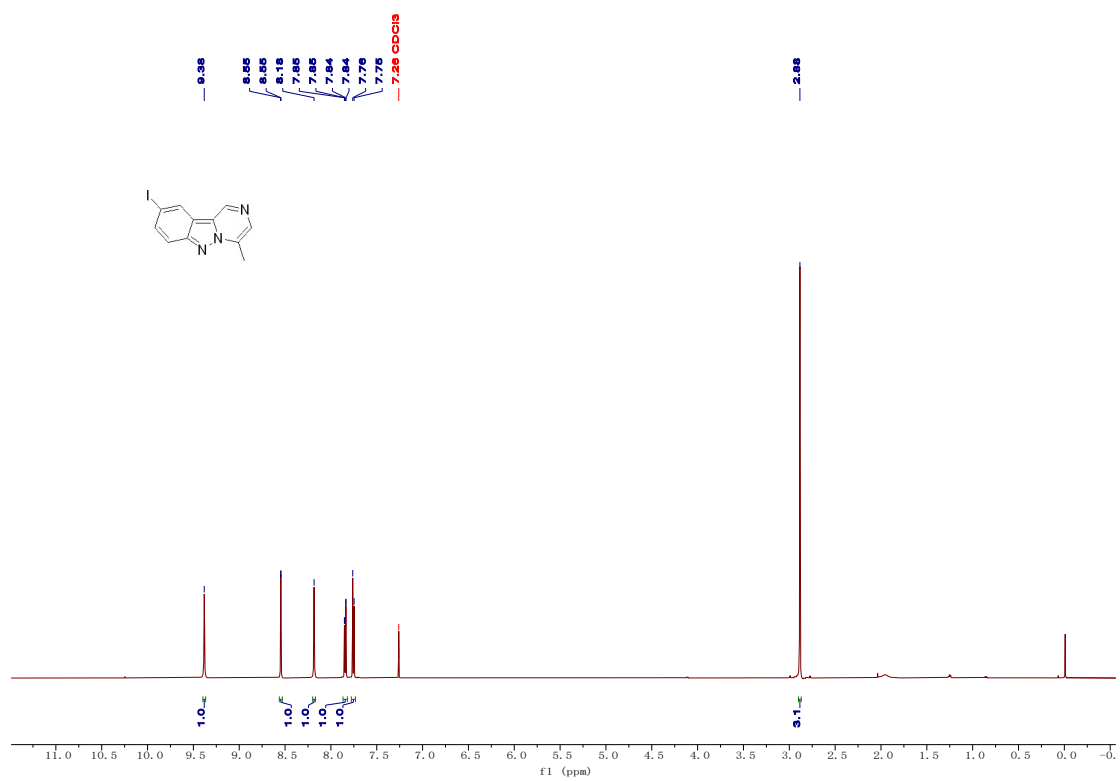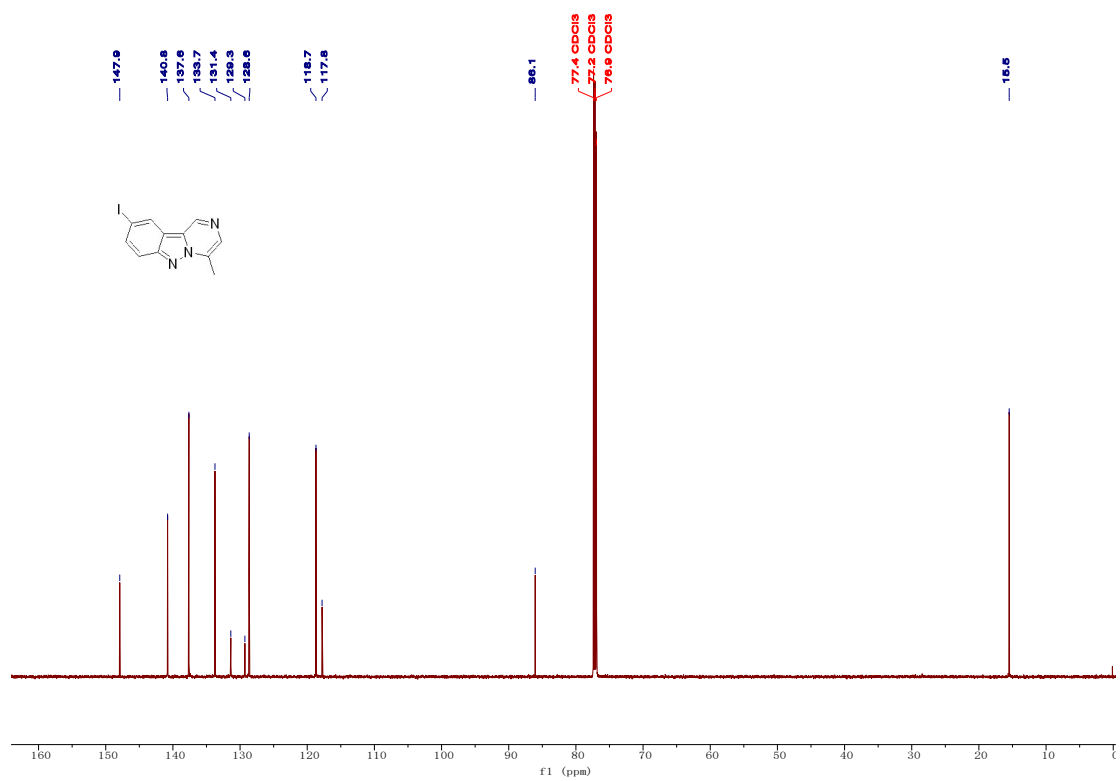

3ia

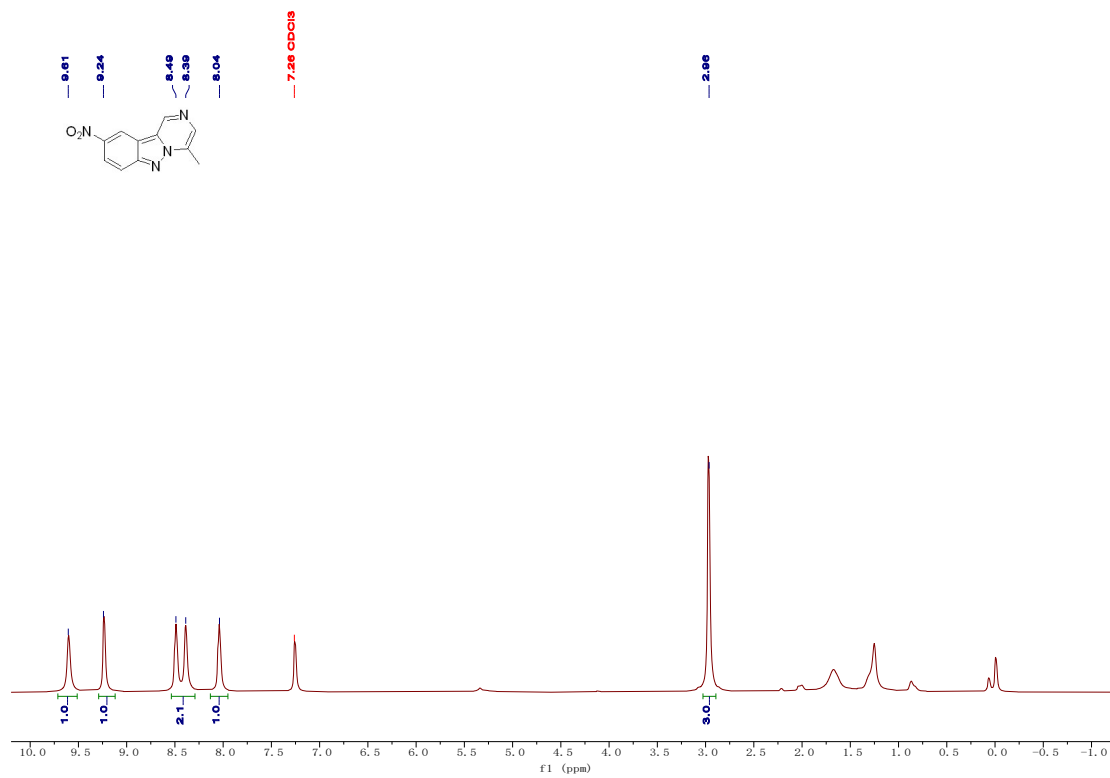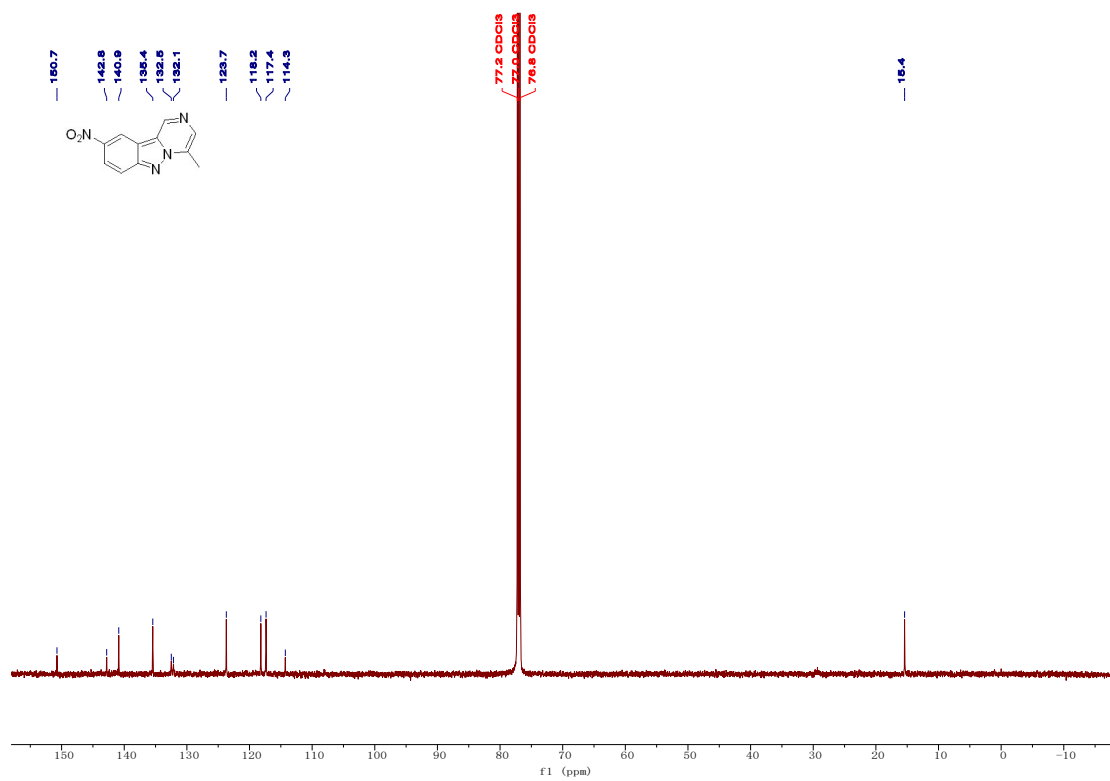

3ja

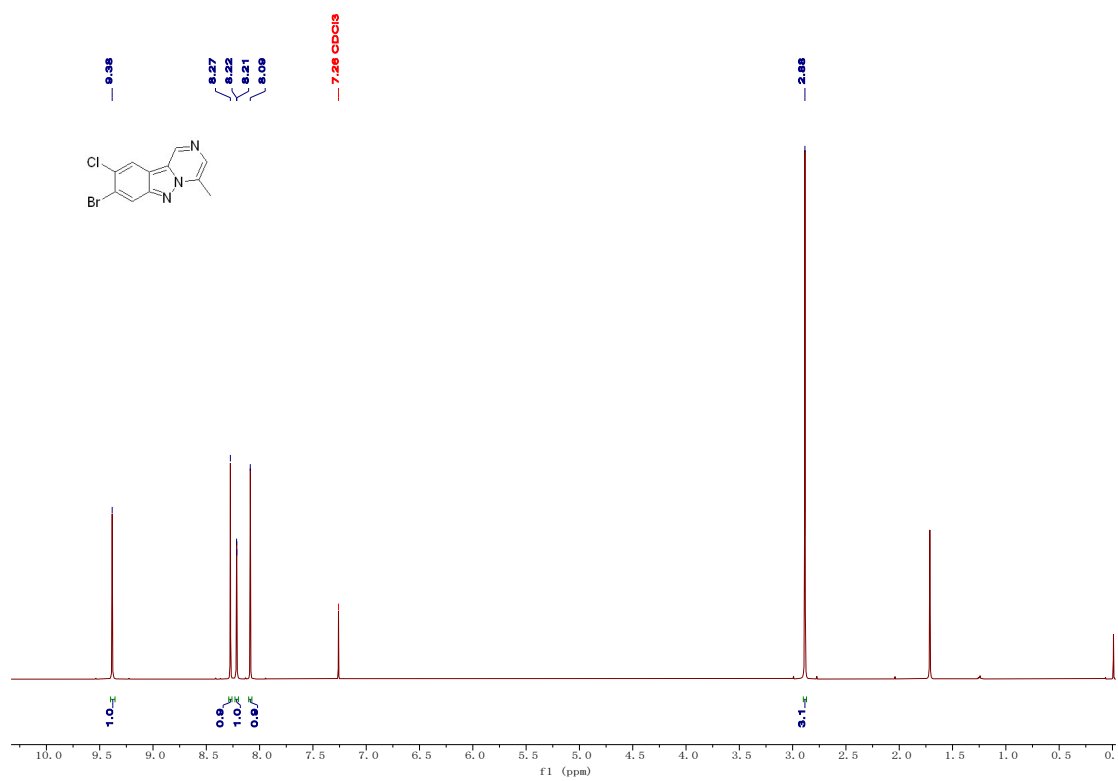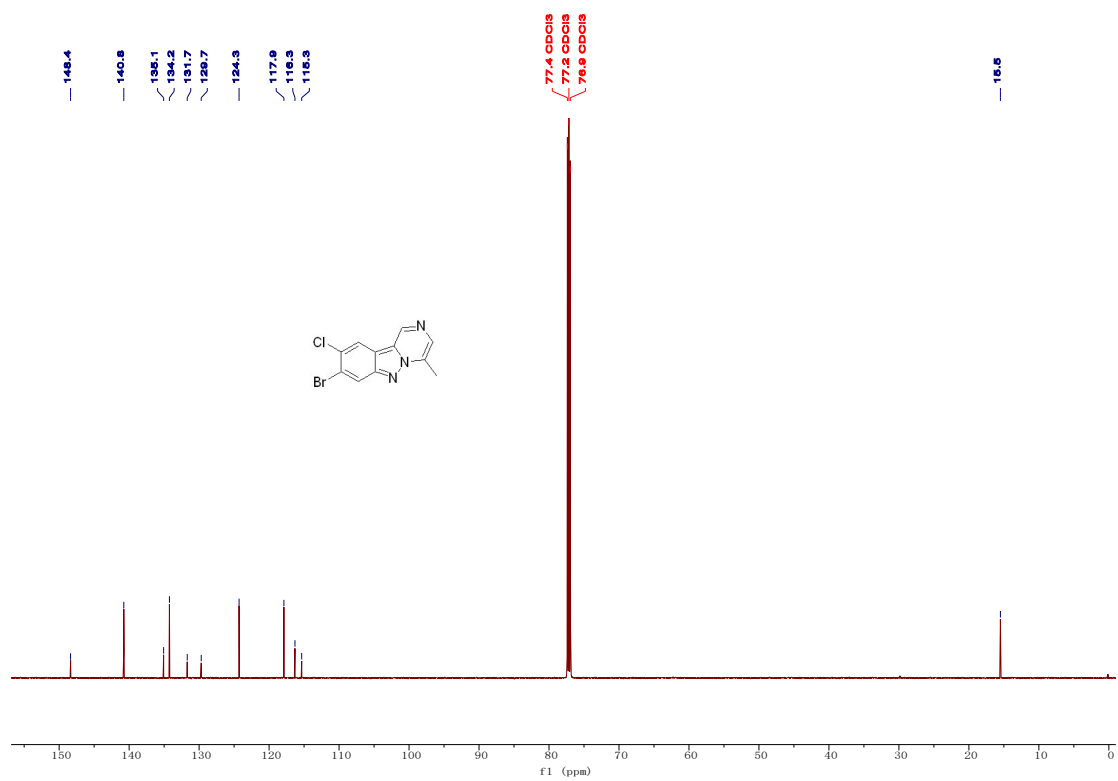

3ka

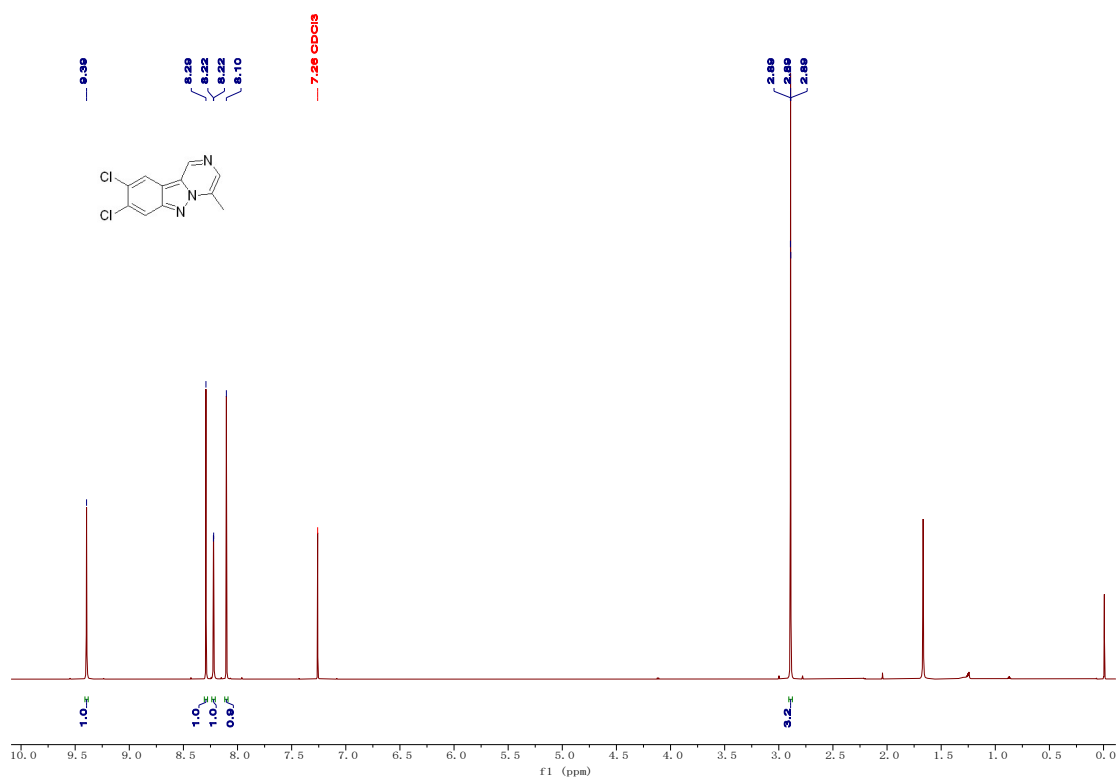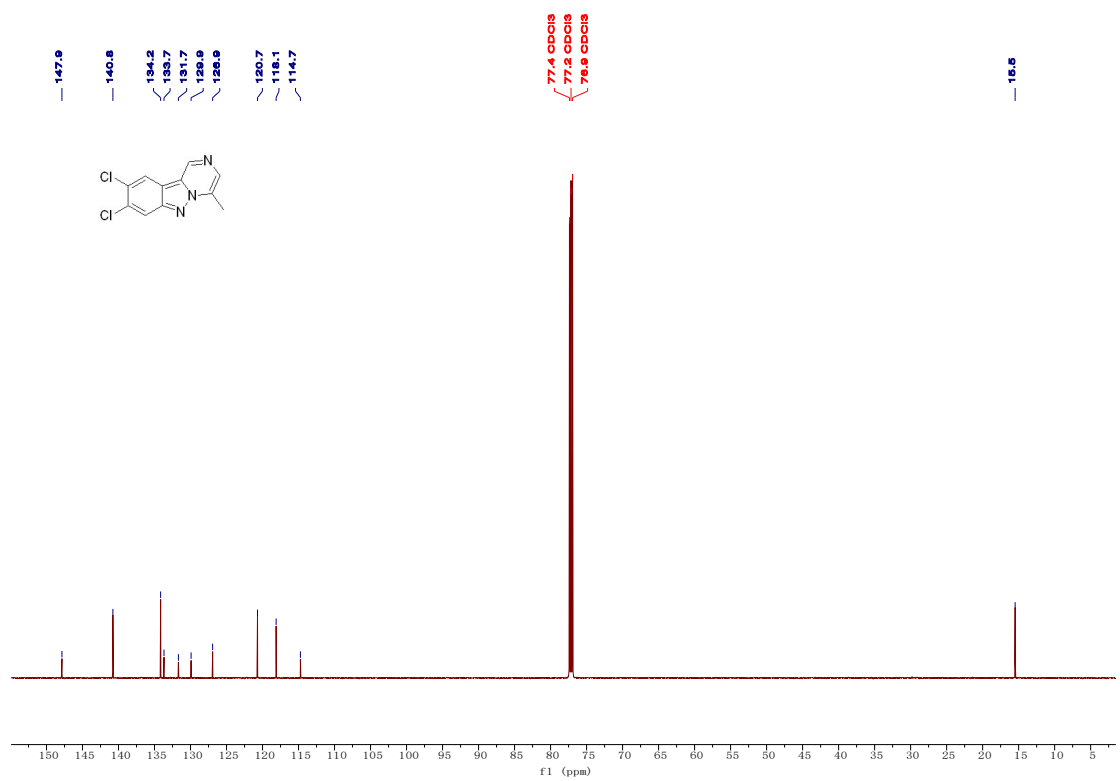



31a

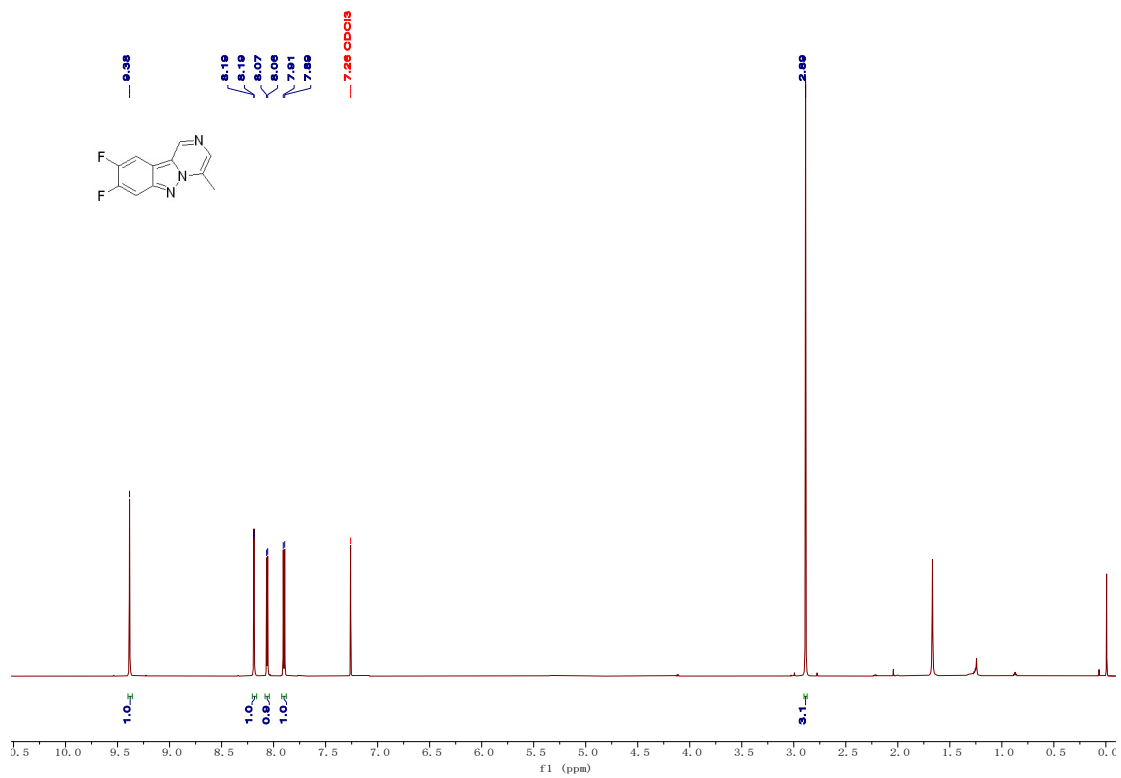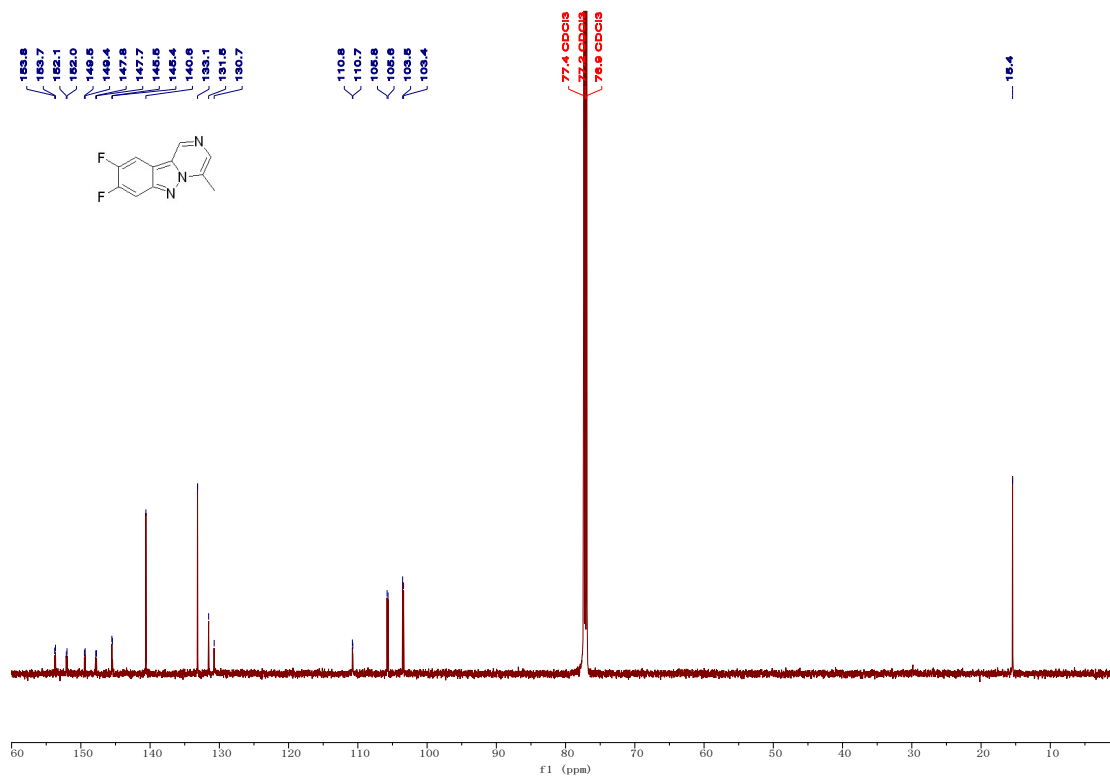

3ma

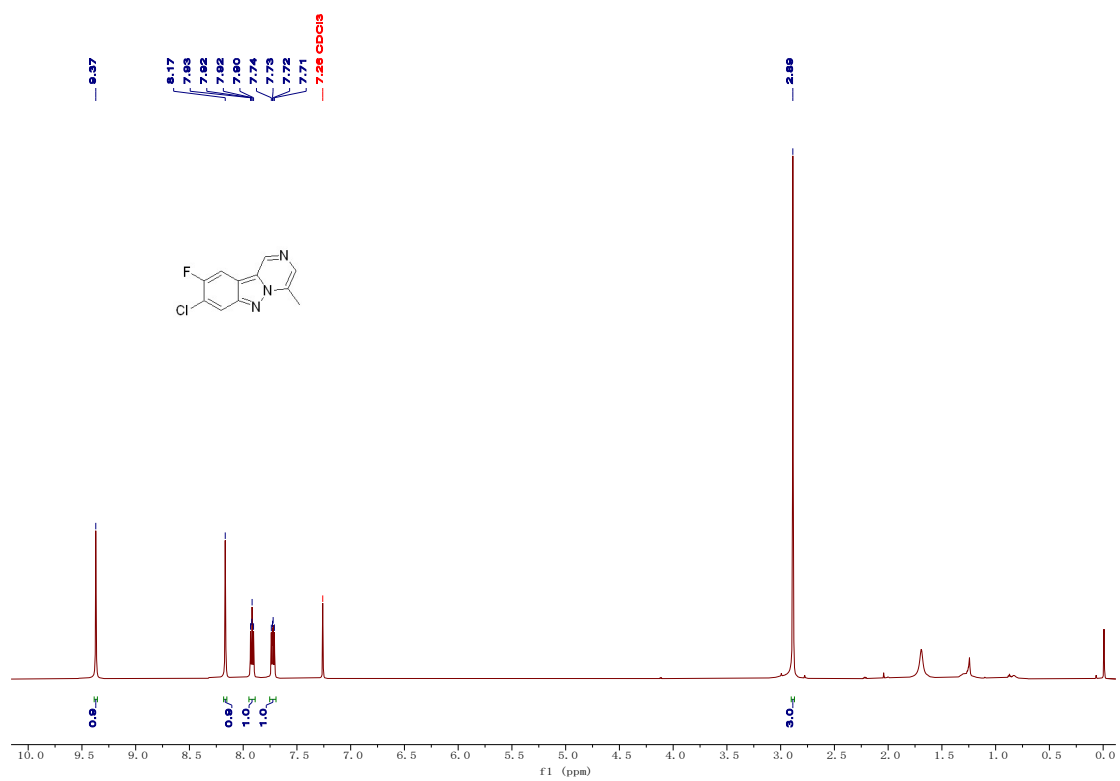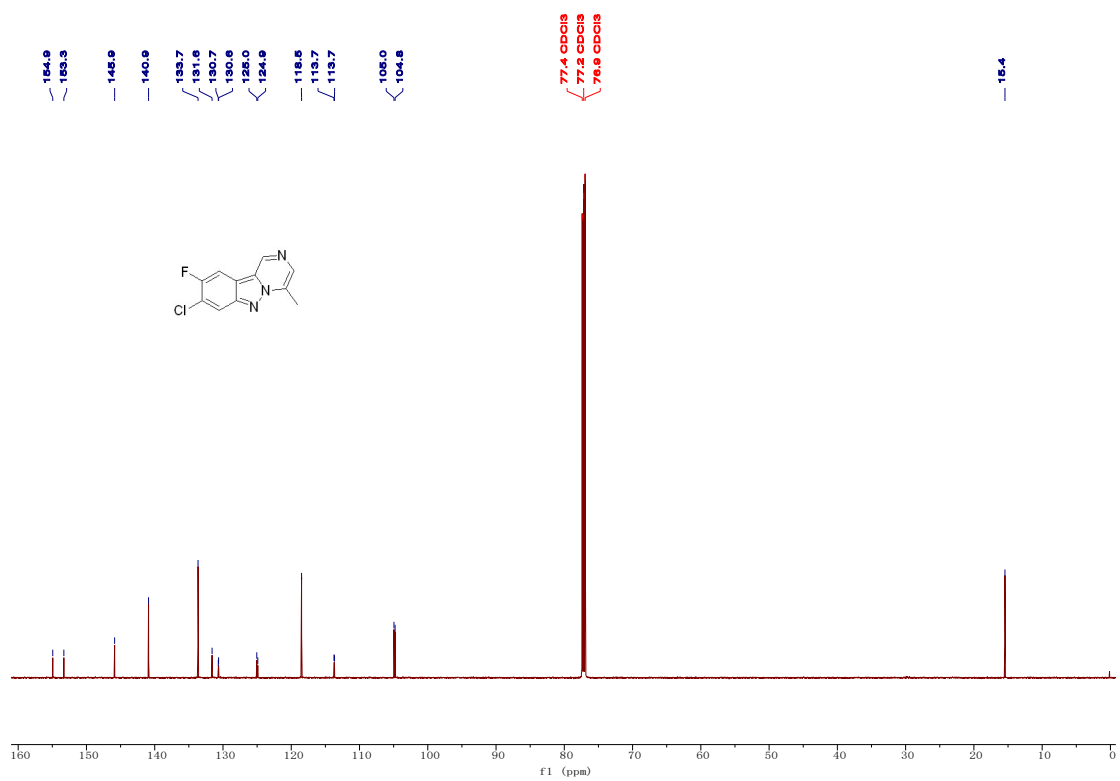

3na

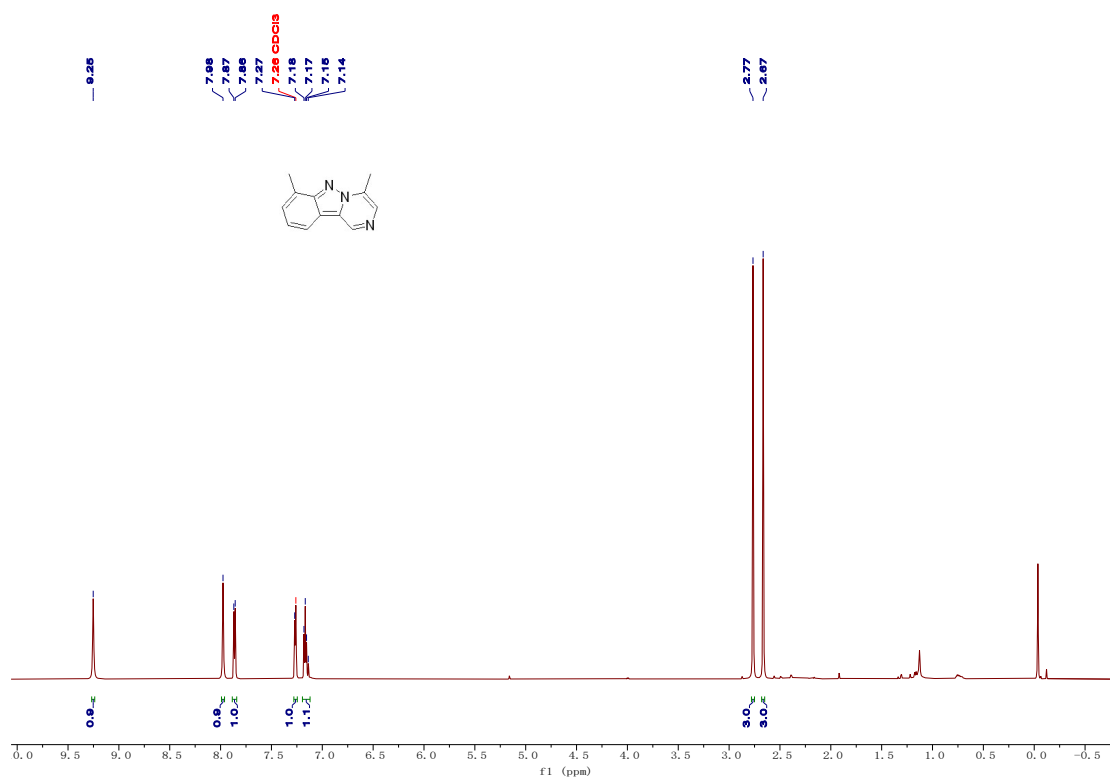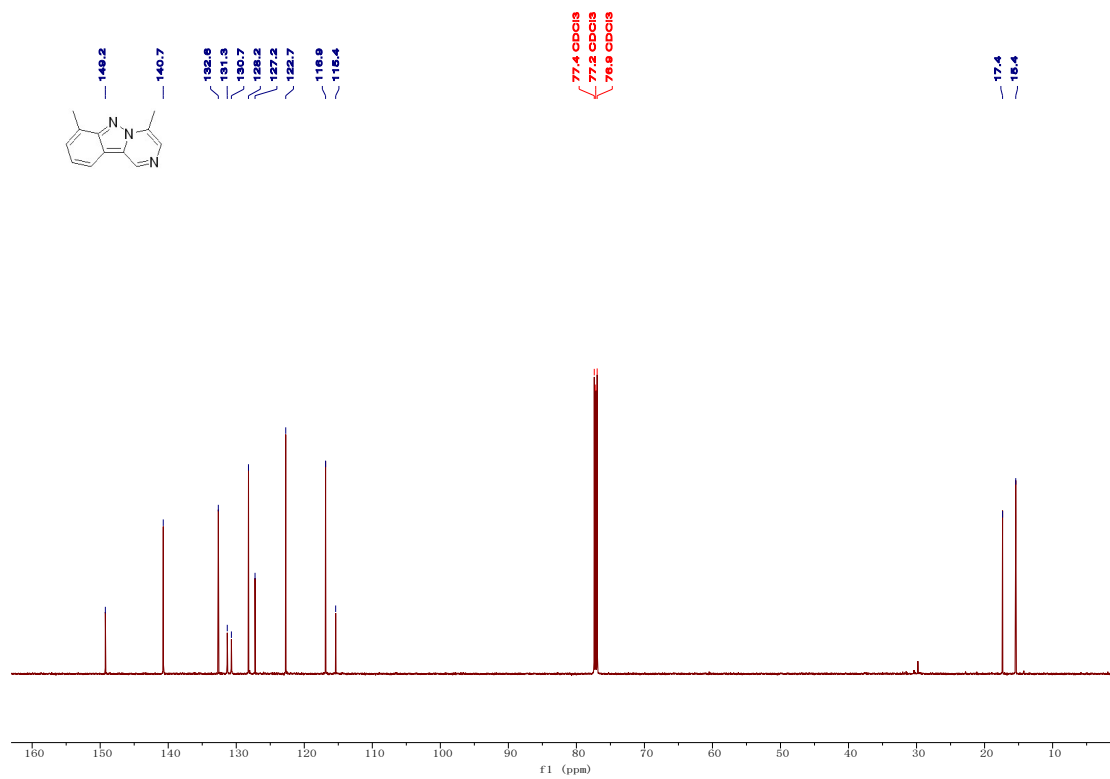

30a

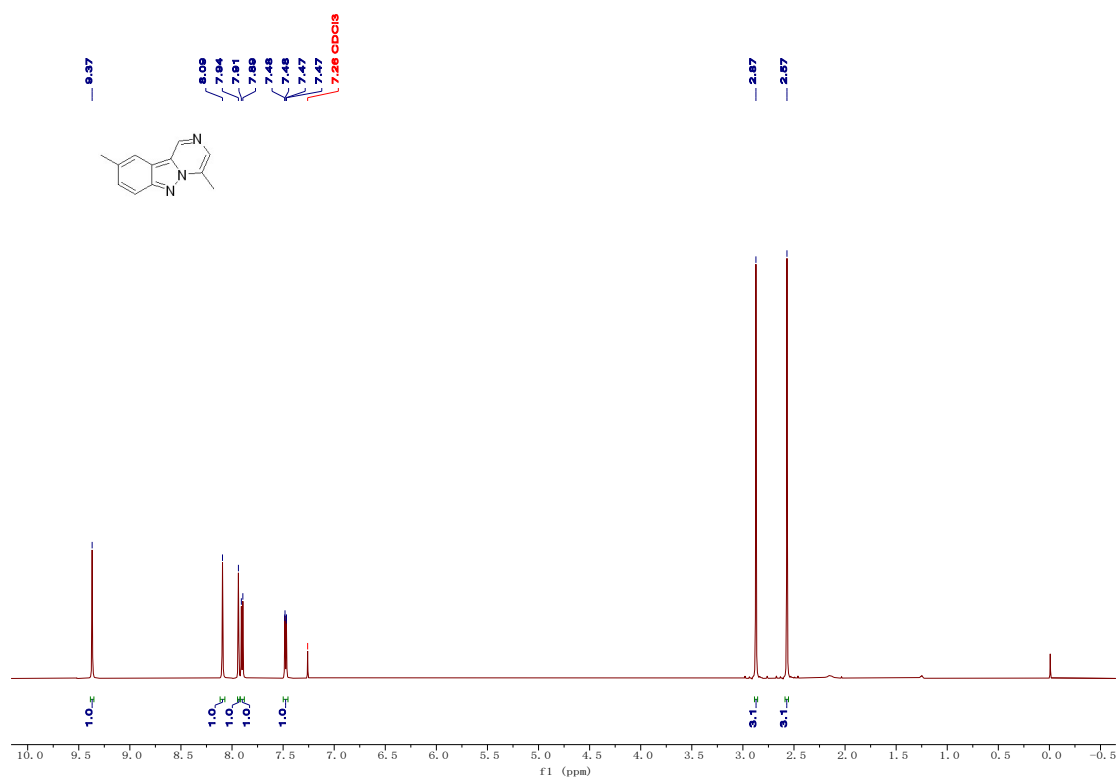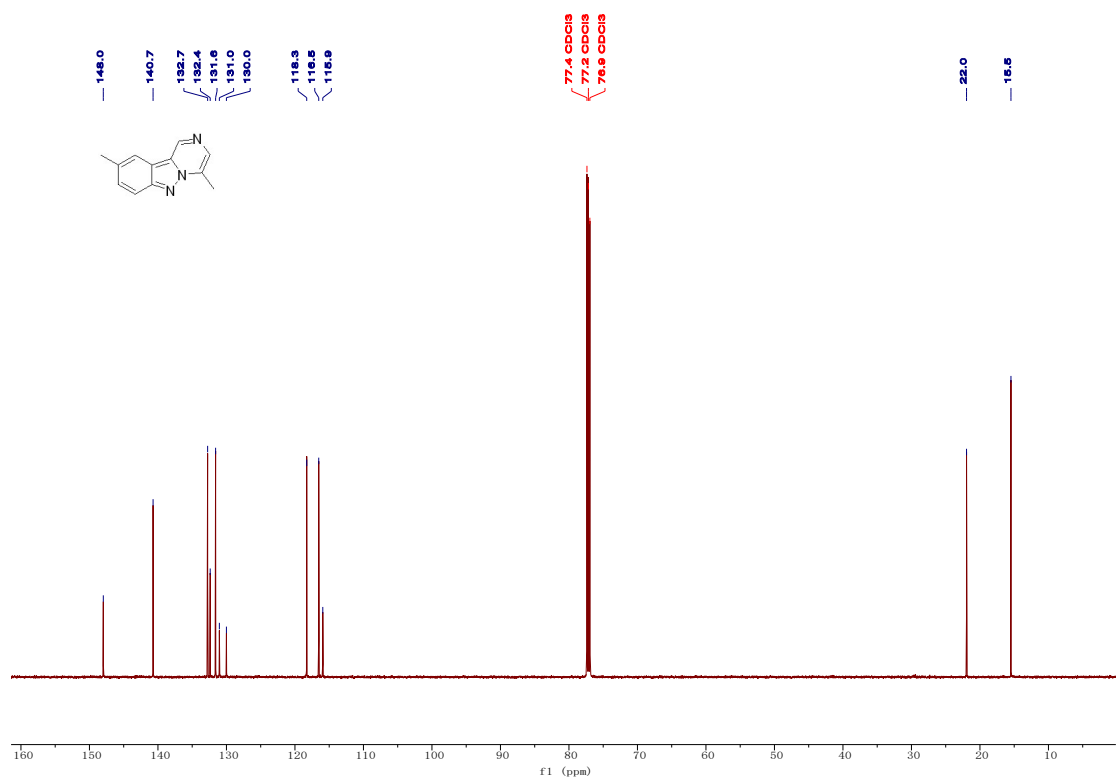

3pa

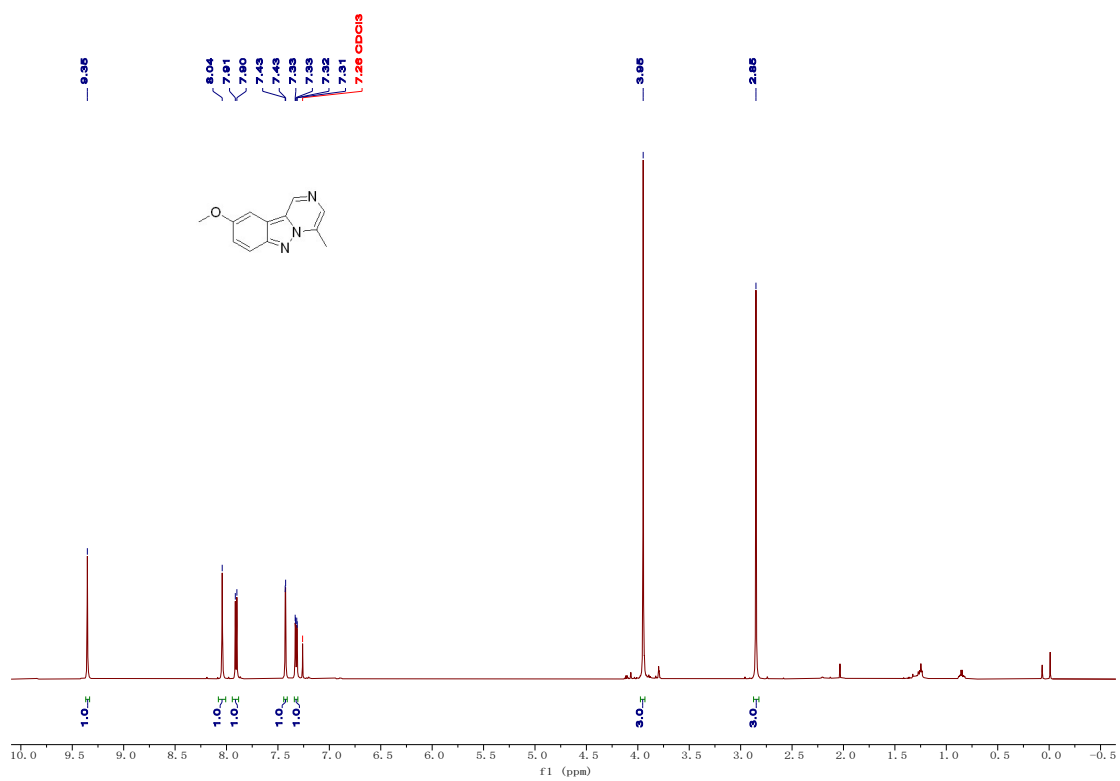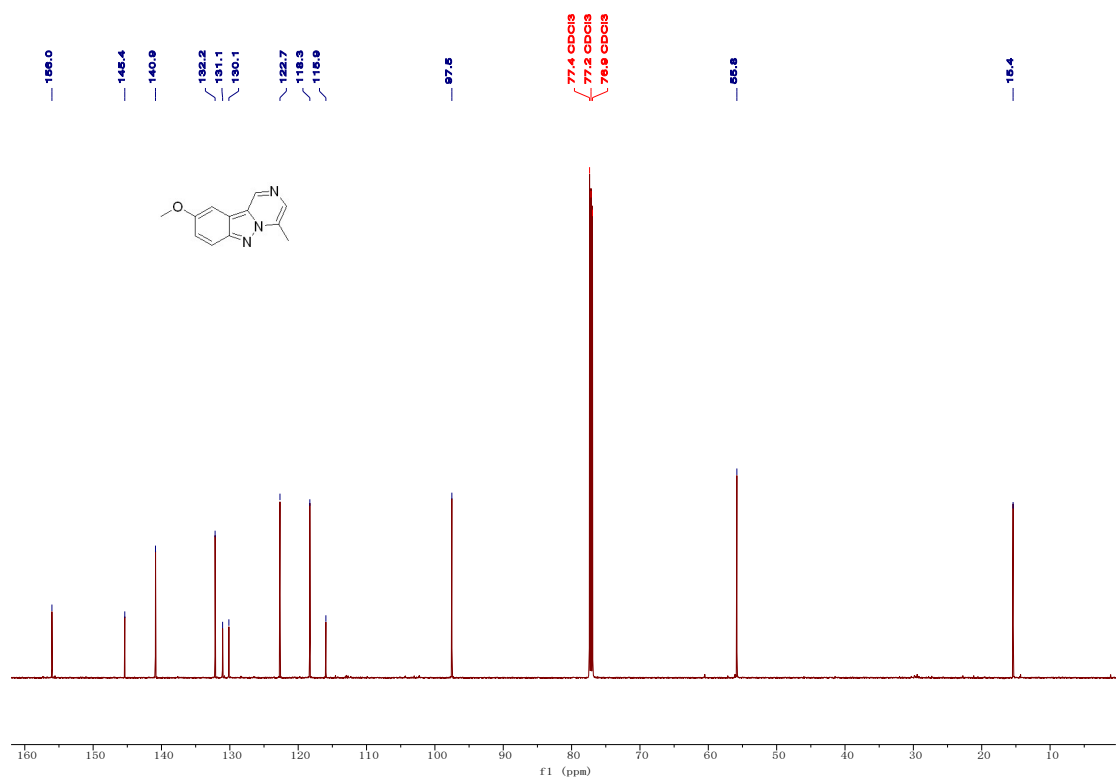

### 3qa

pdata/1

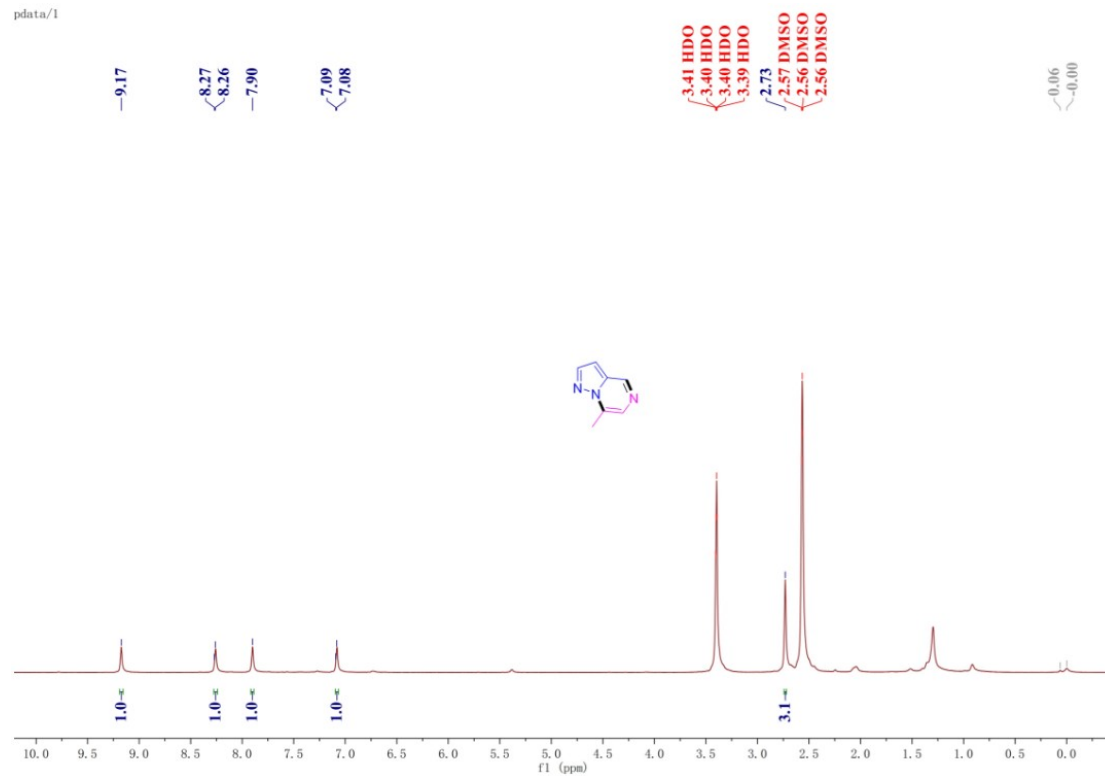

pdata/1

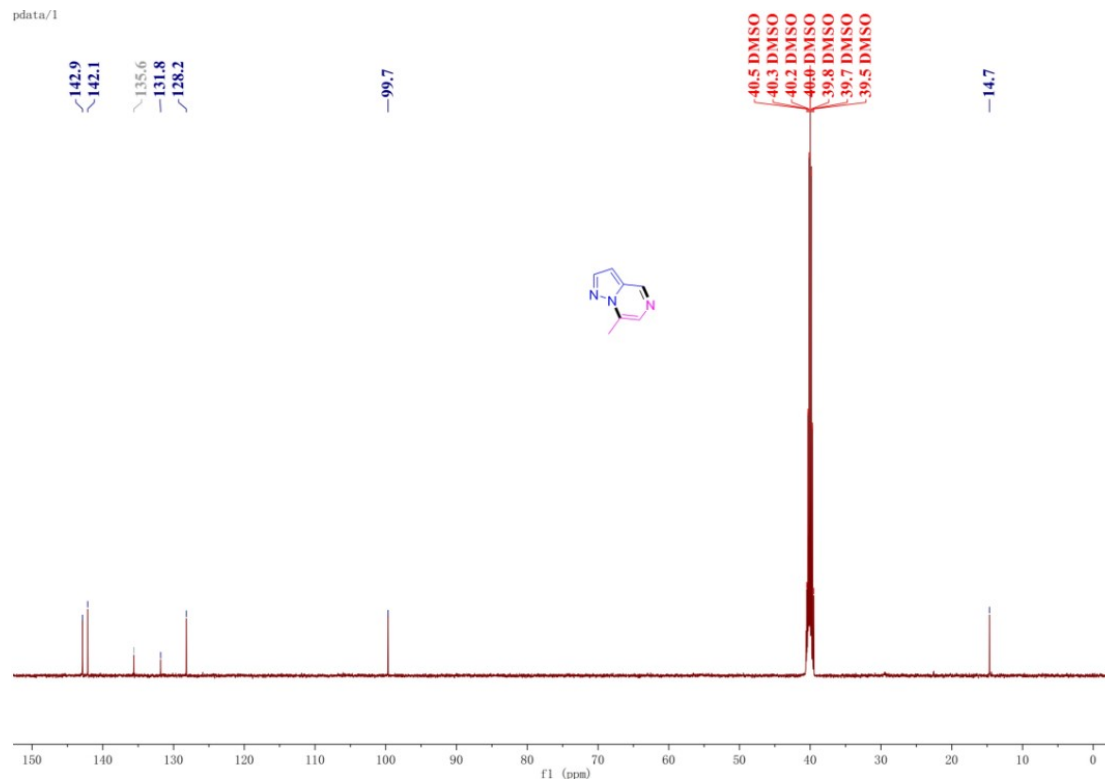

3ab

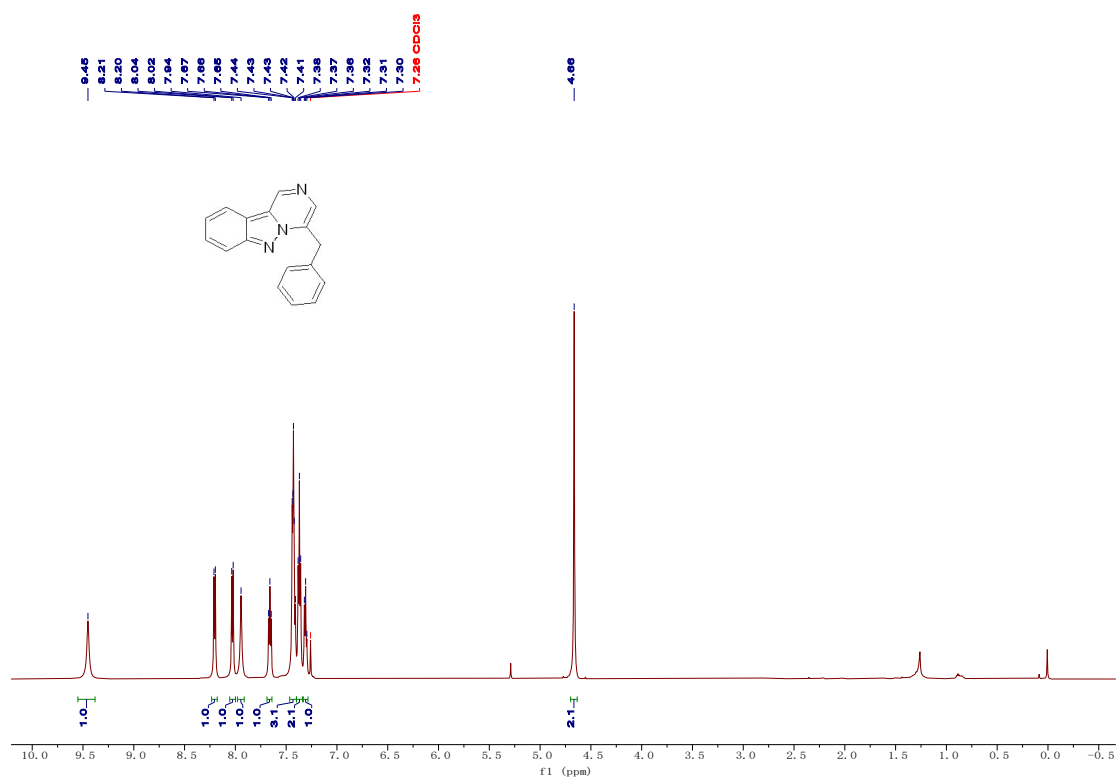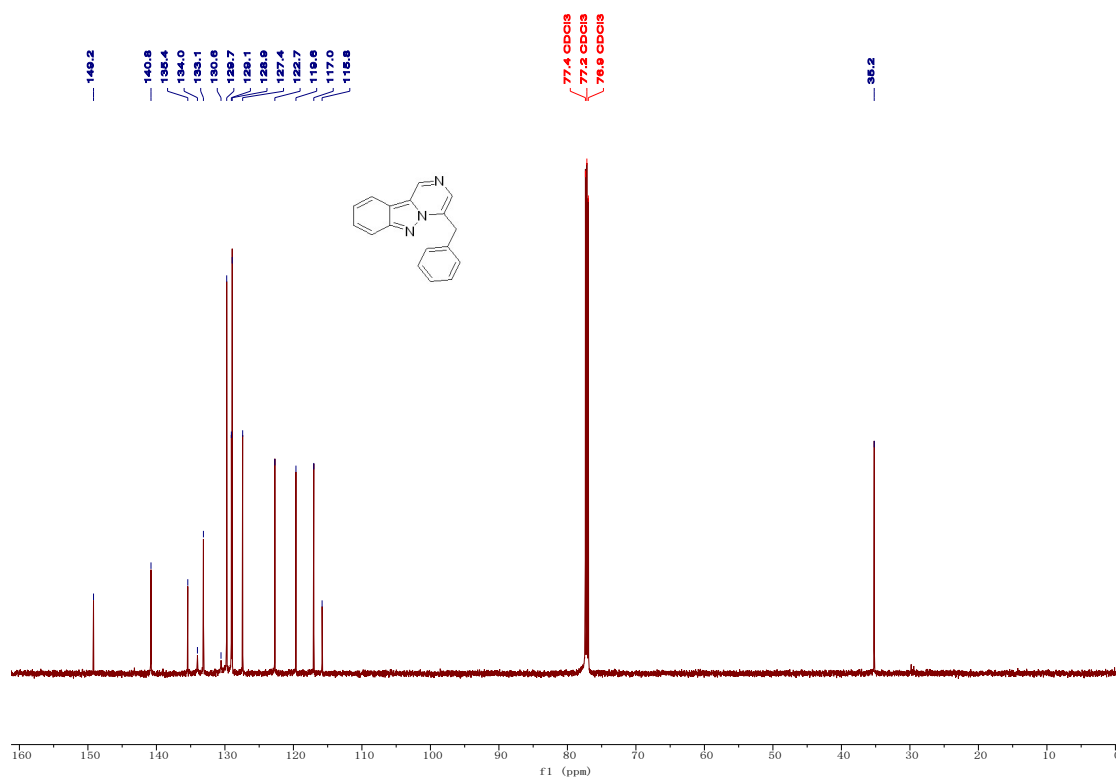

### 3ac

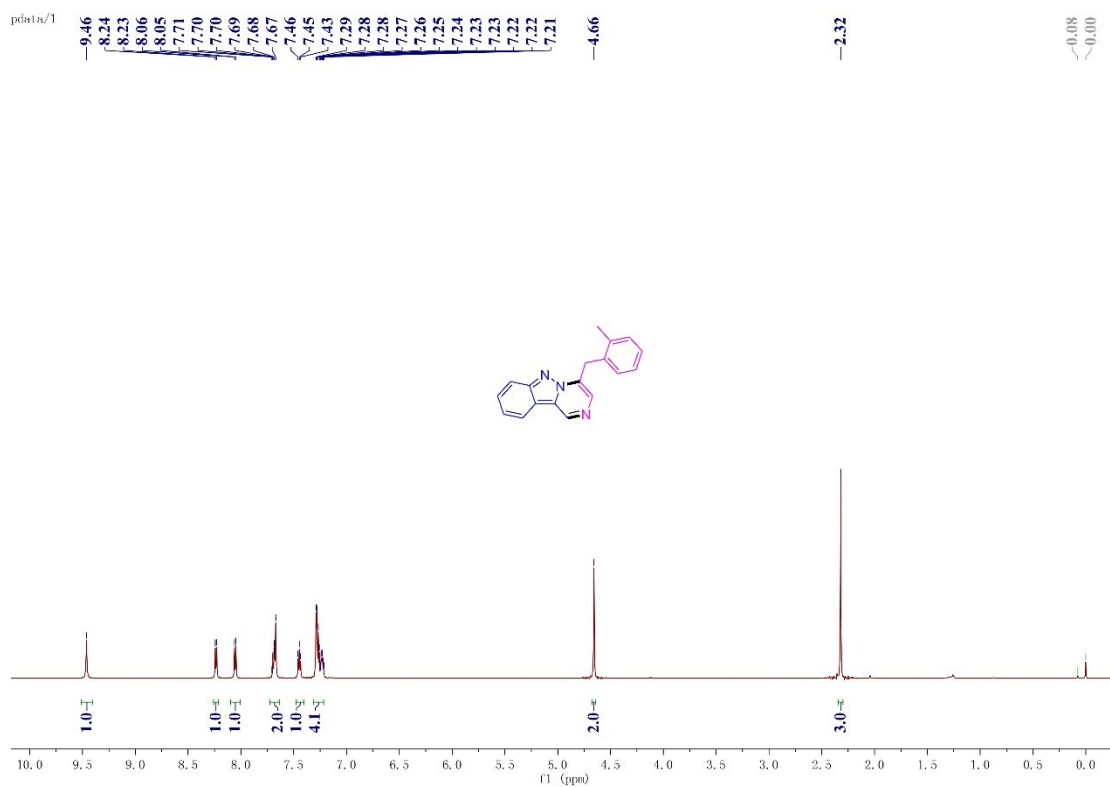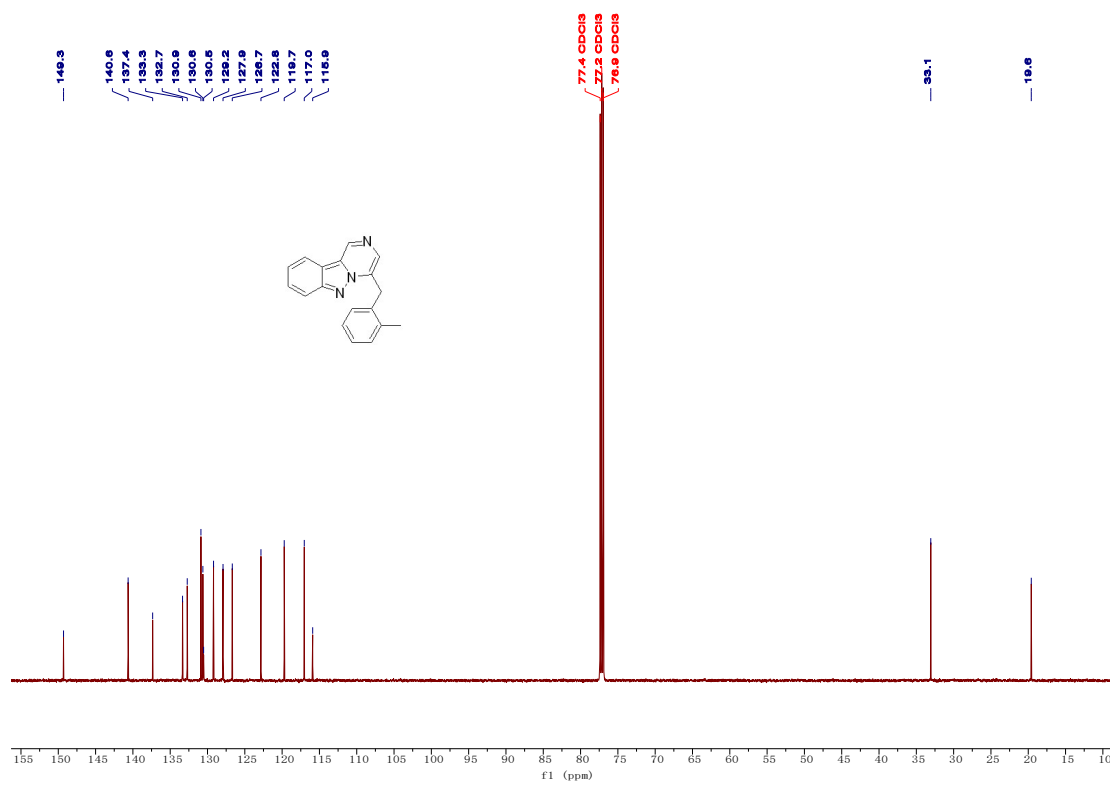



3ad

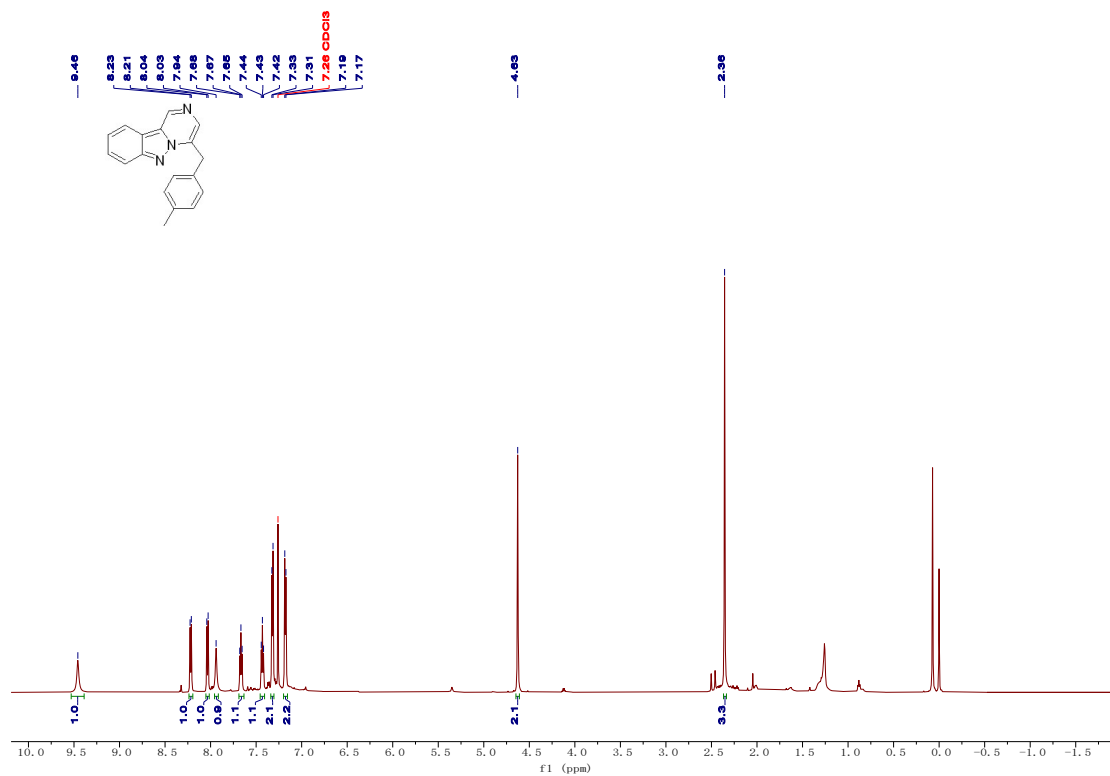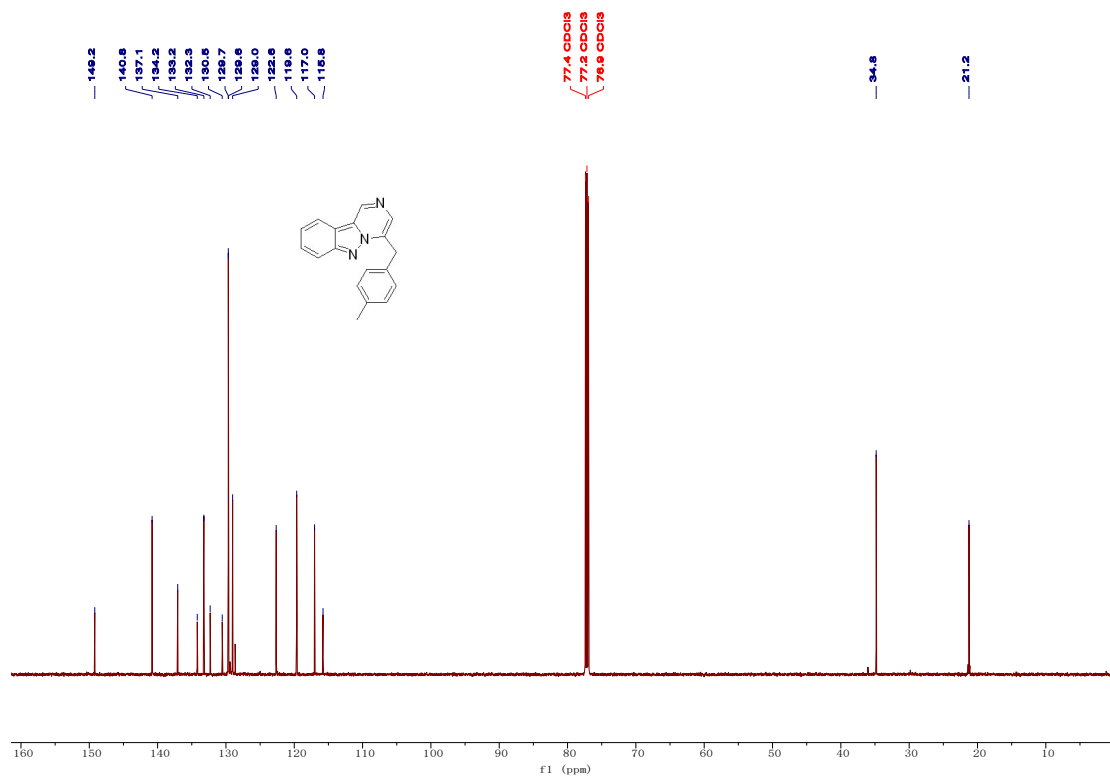

3ae

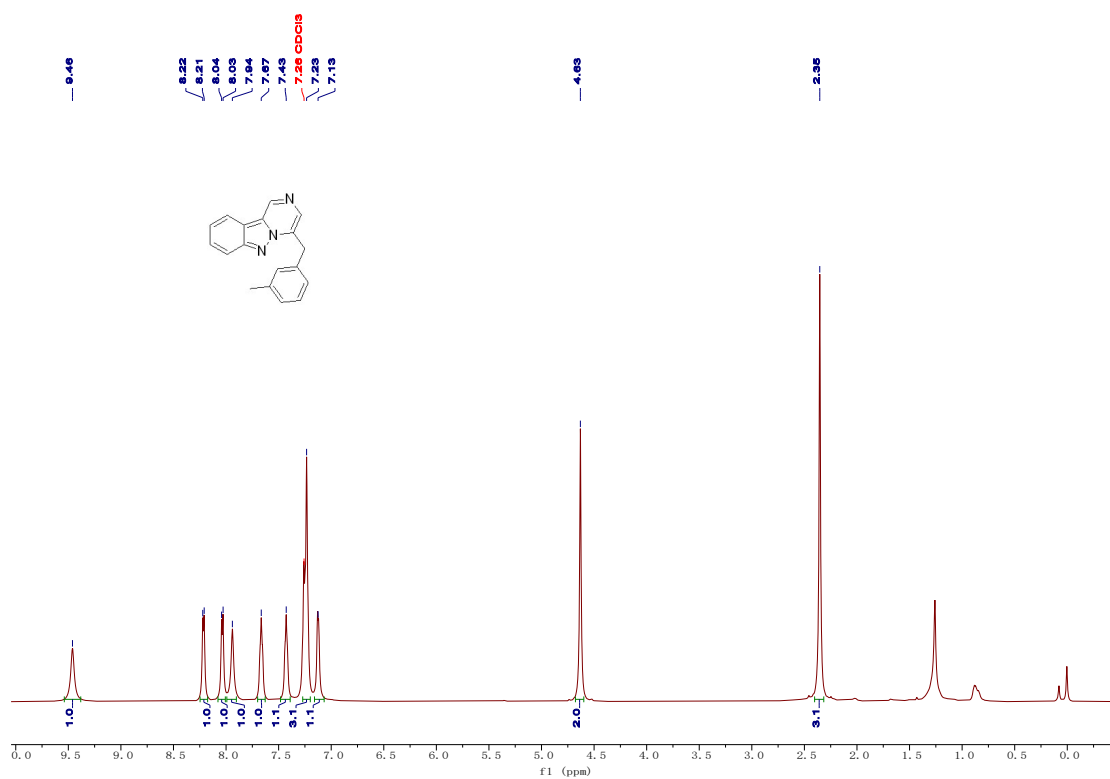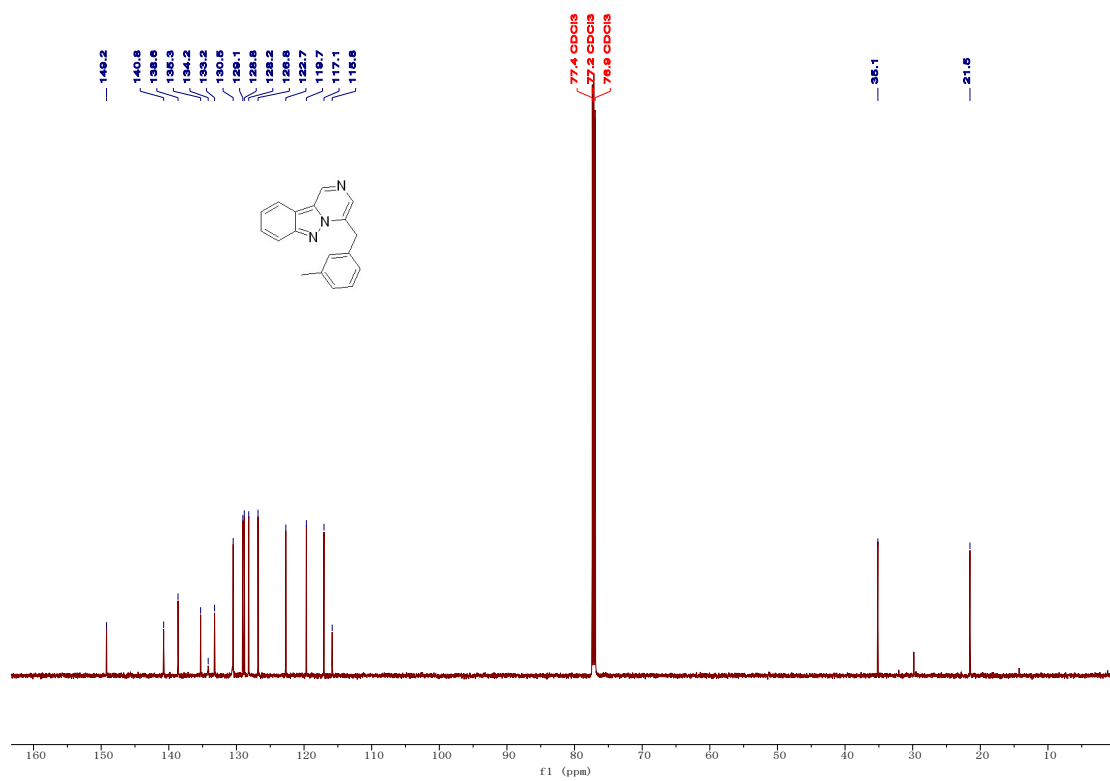

3af

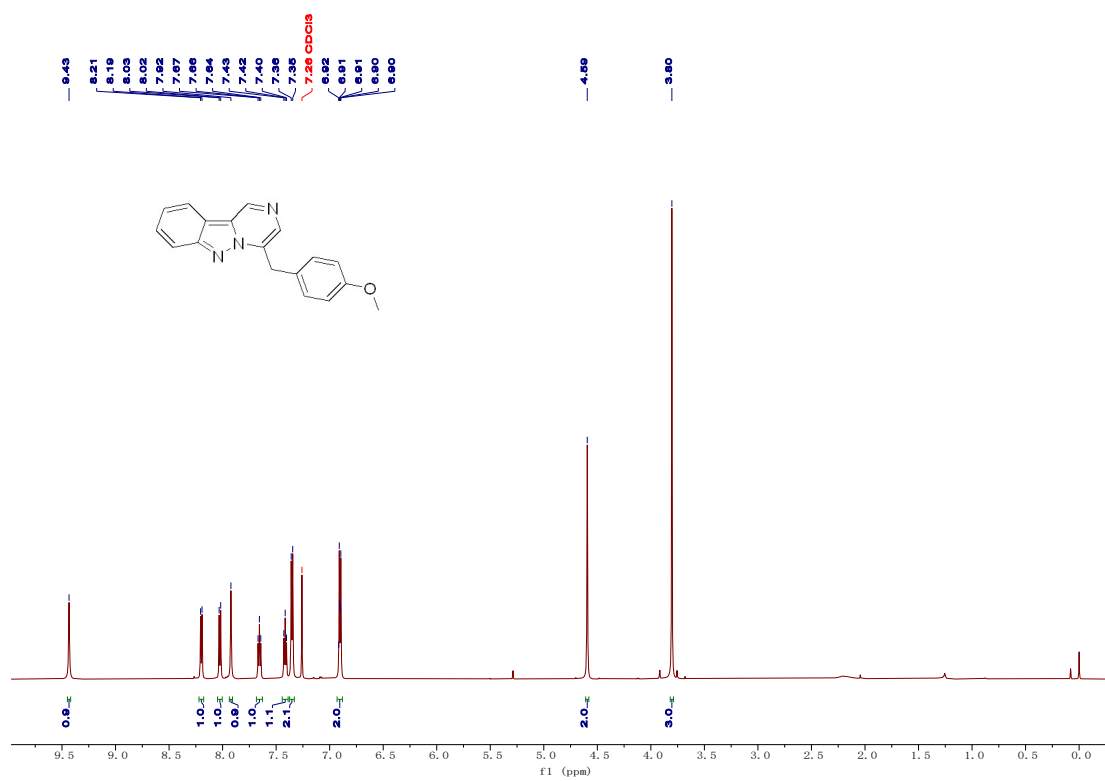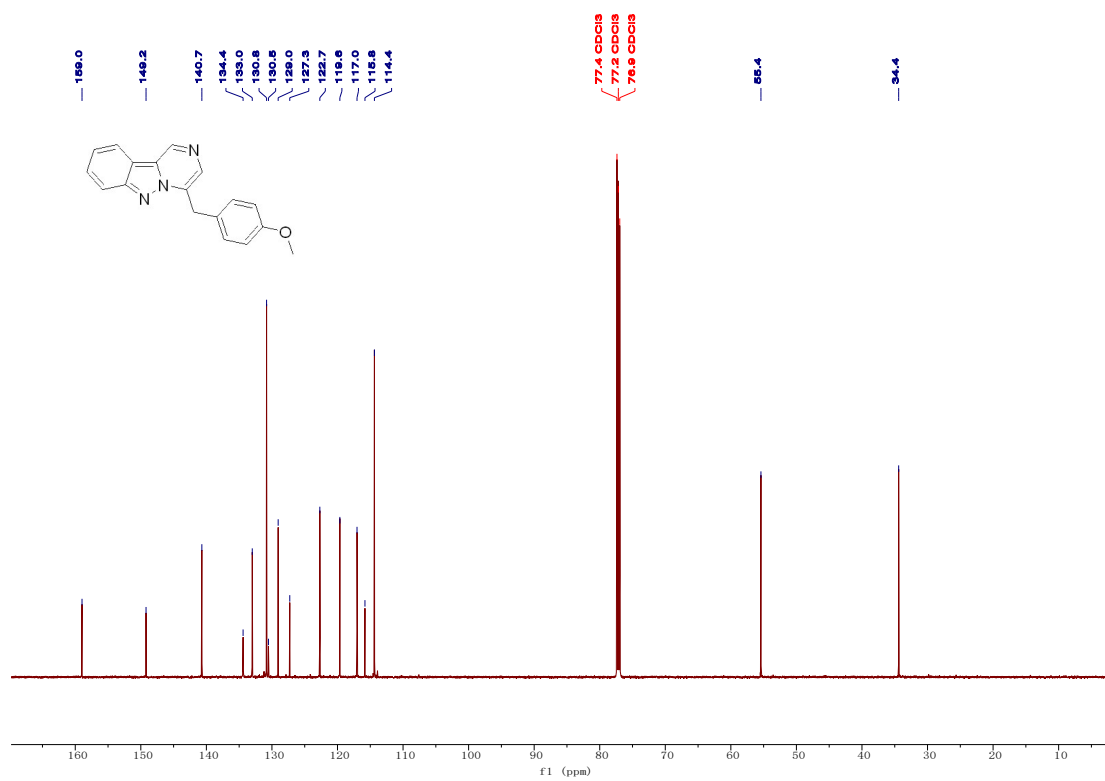

3ag

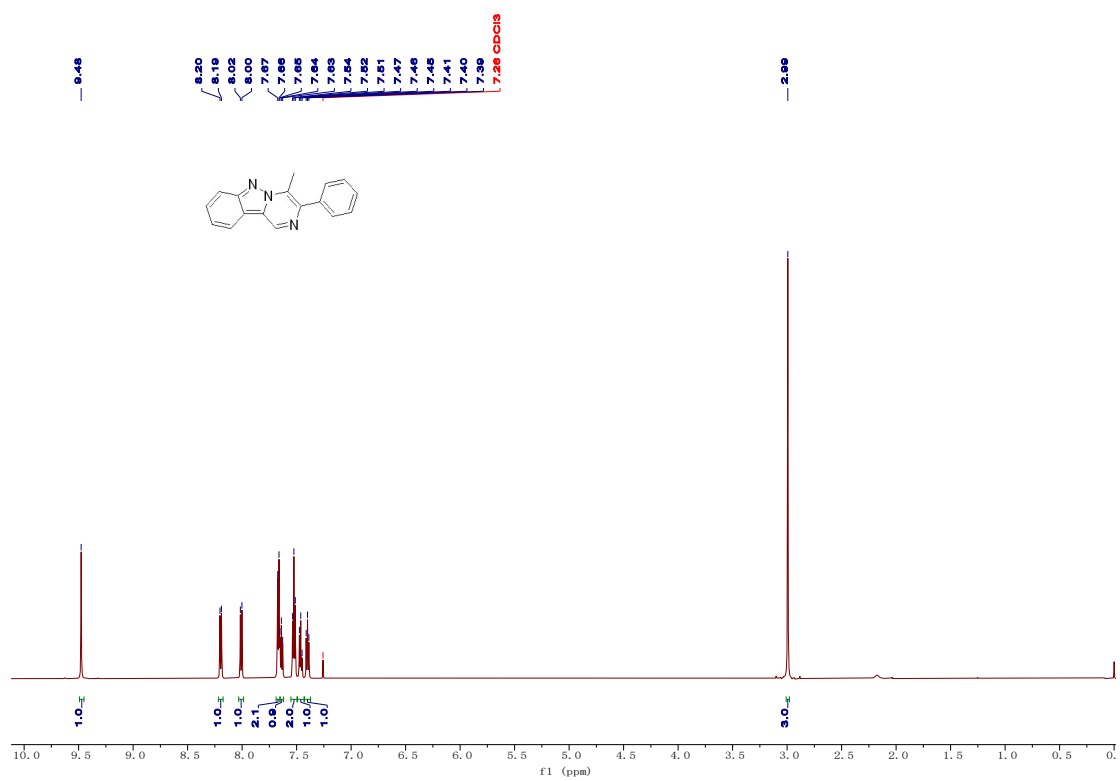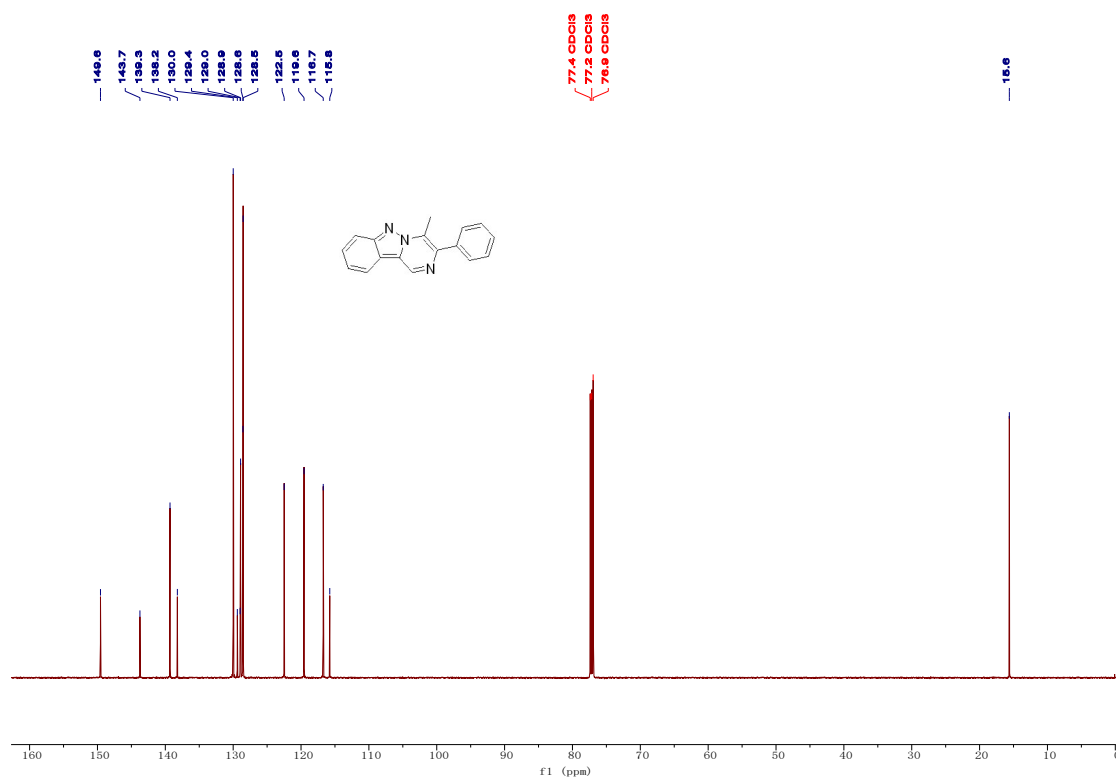

3ah

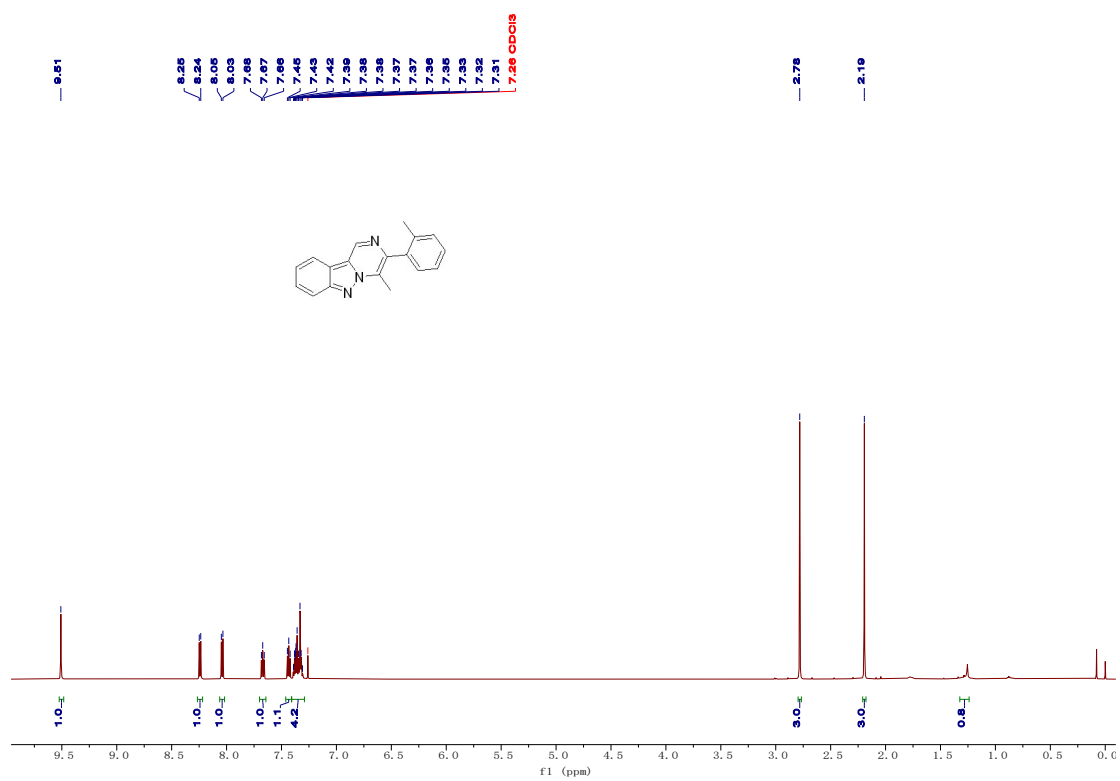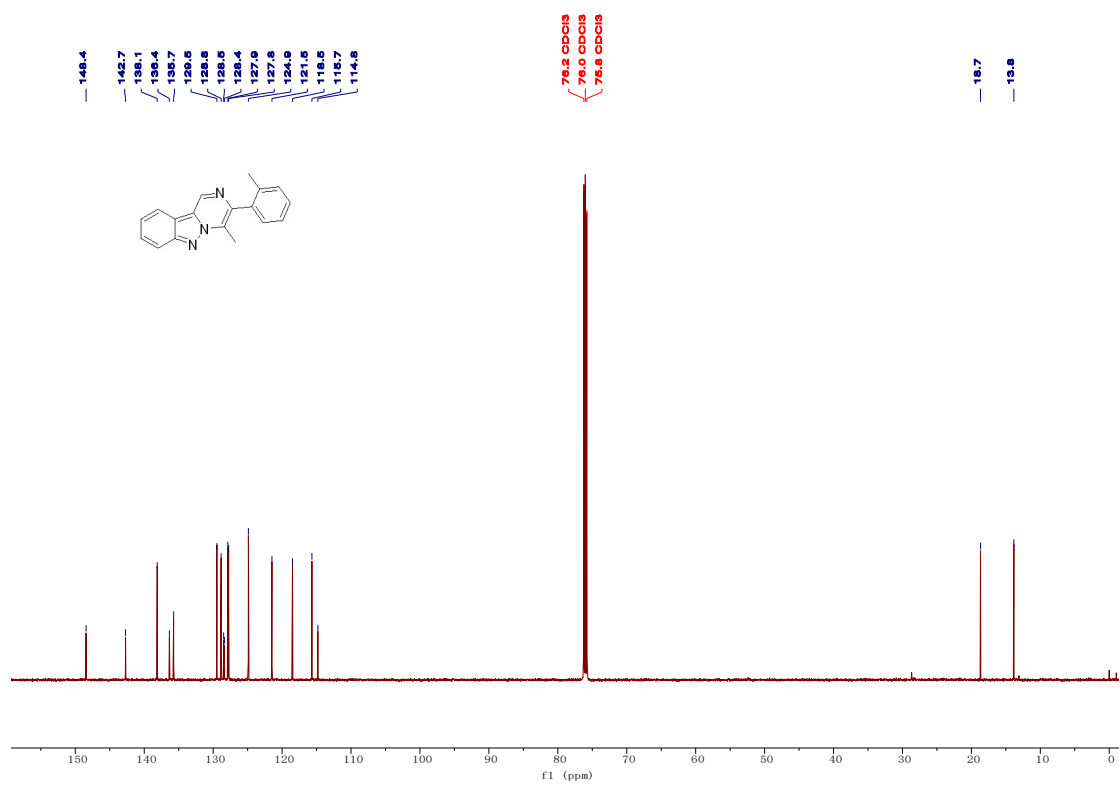

3ai

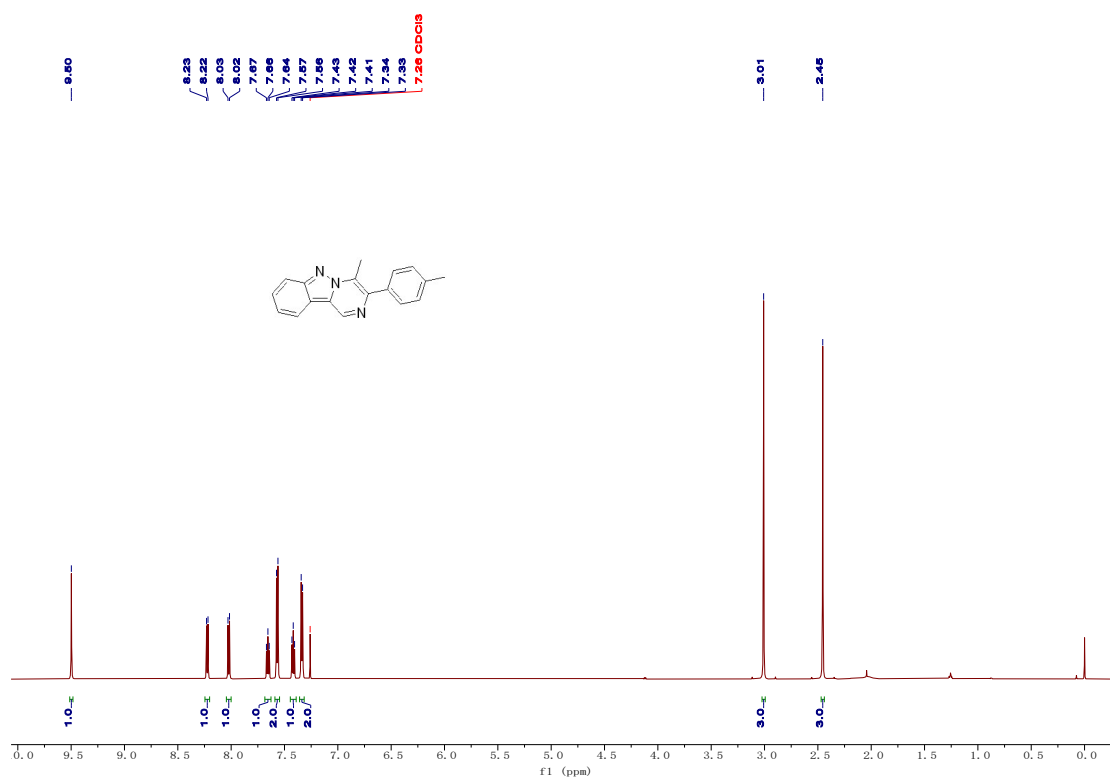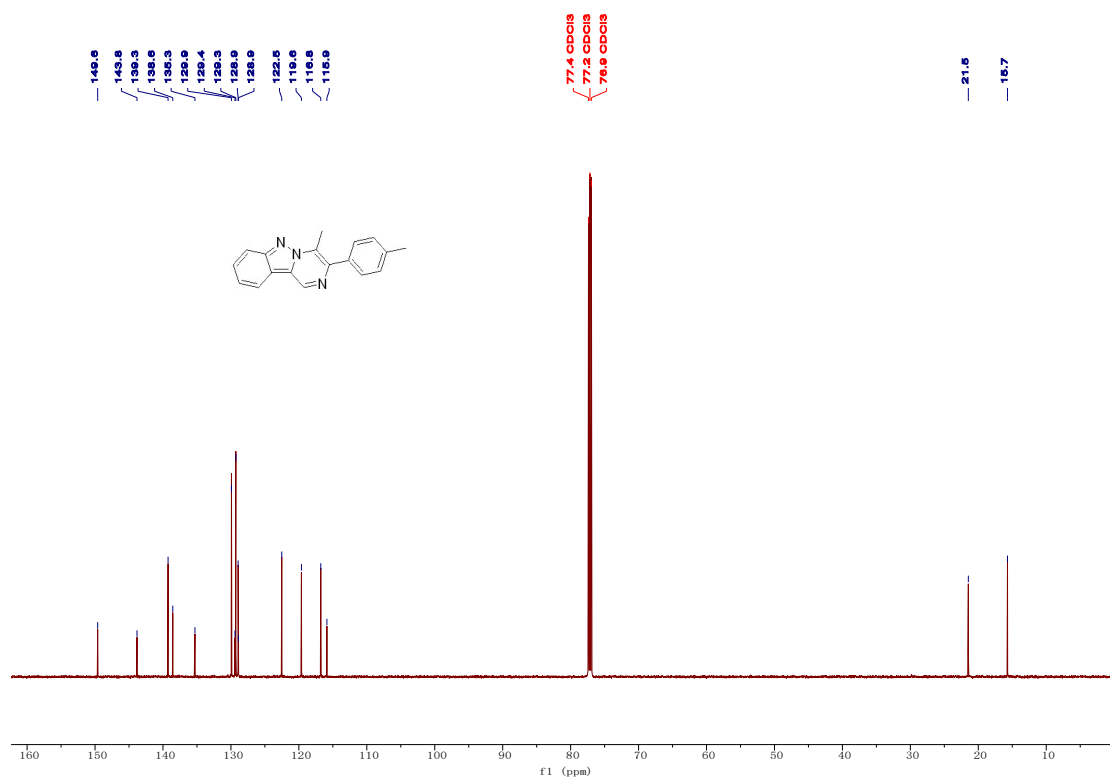

3aj

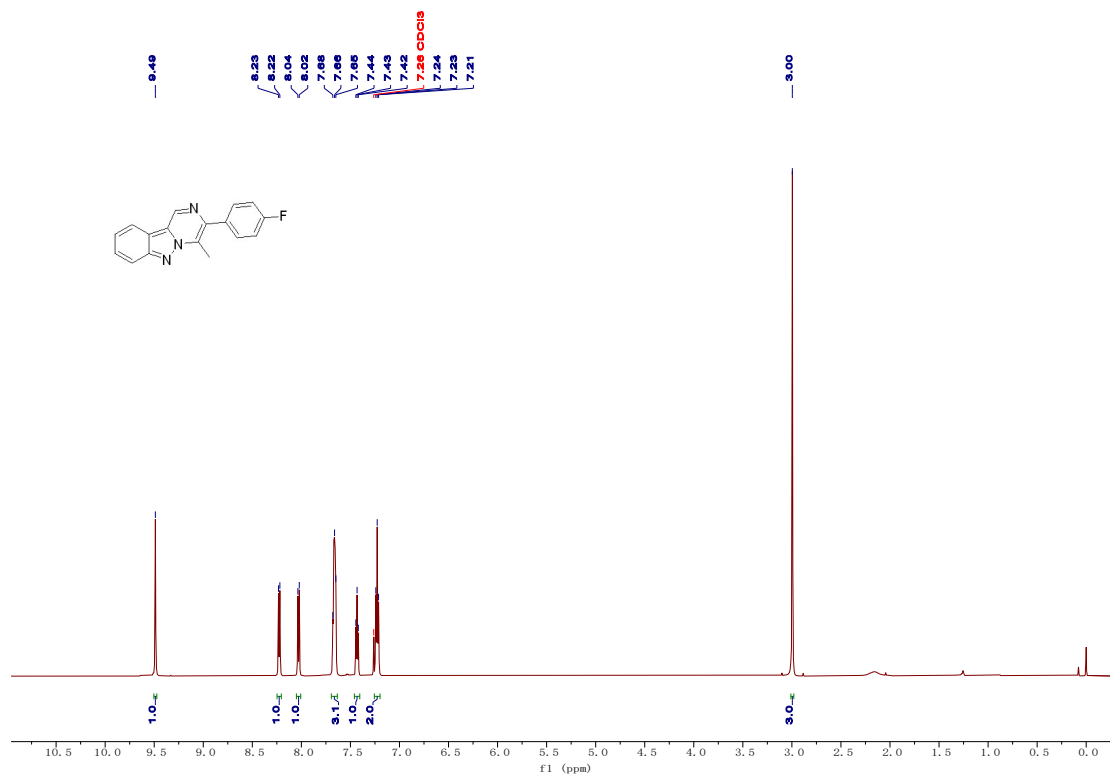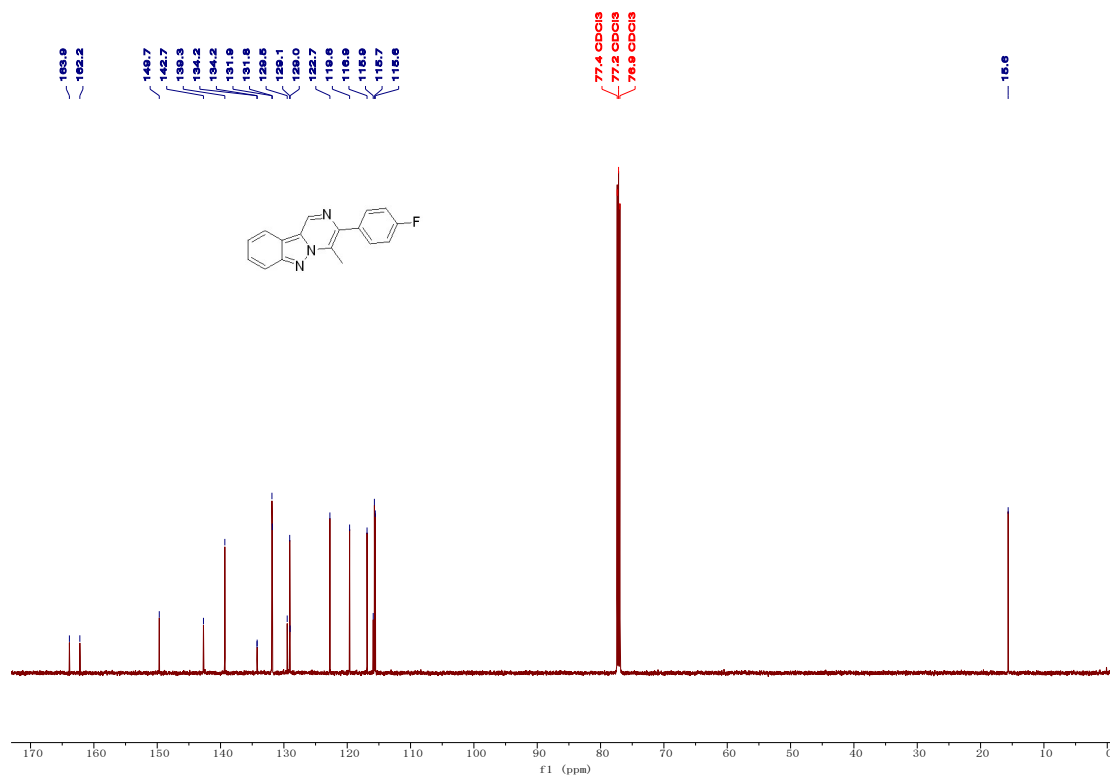

3ak

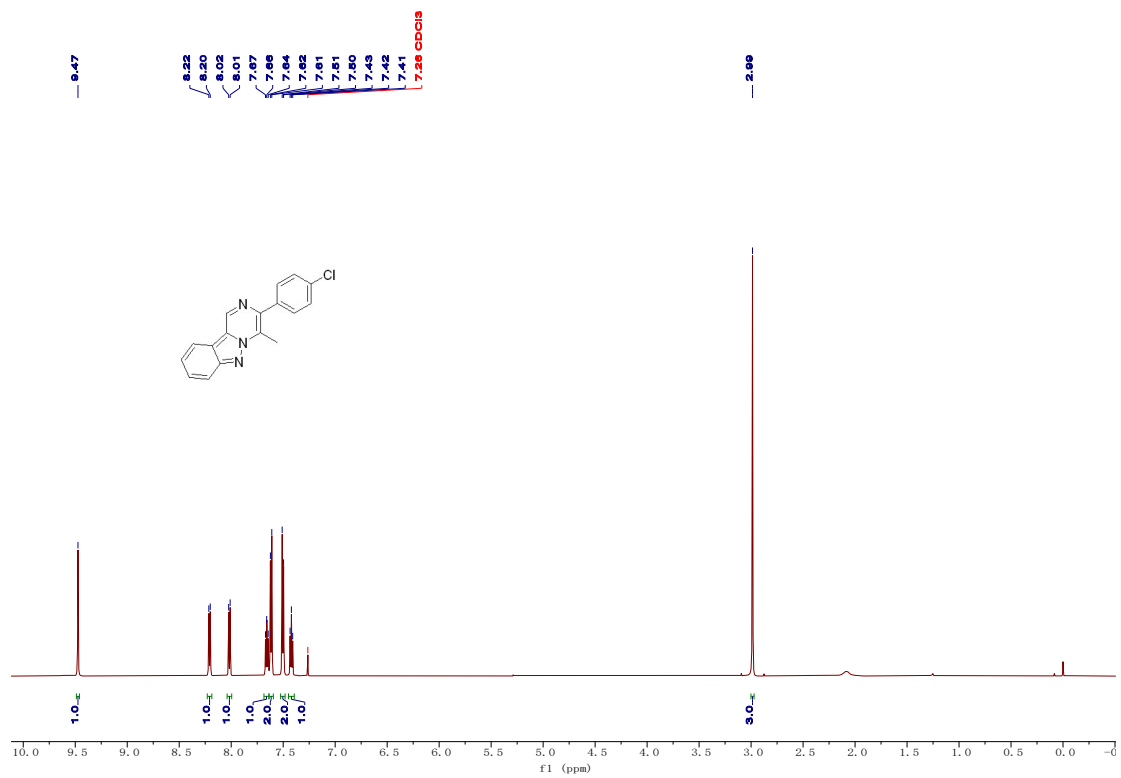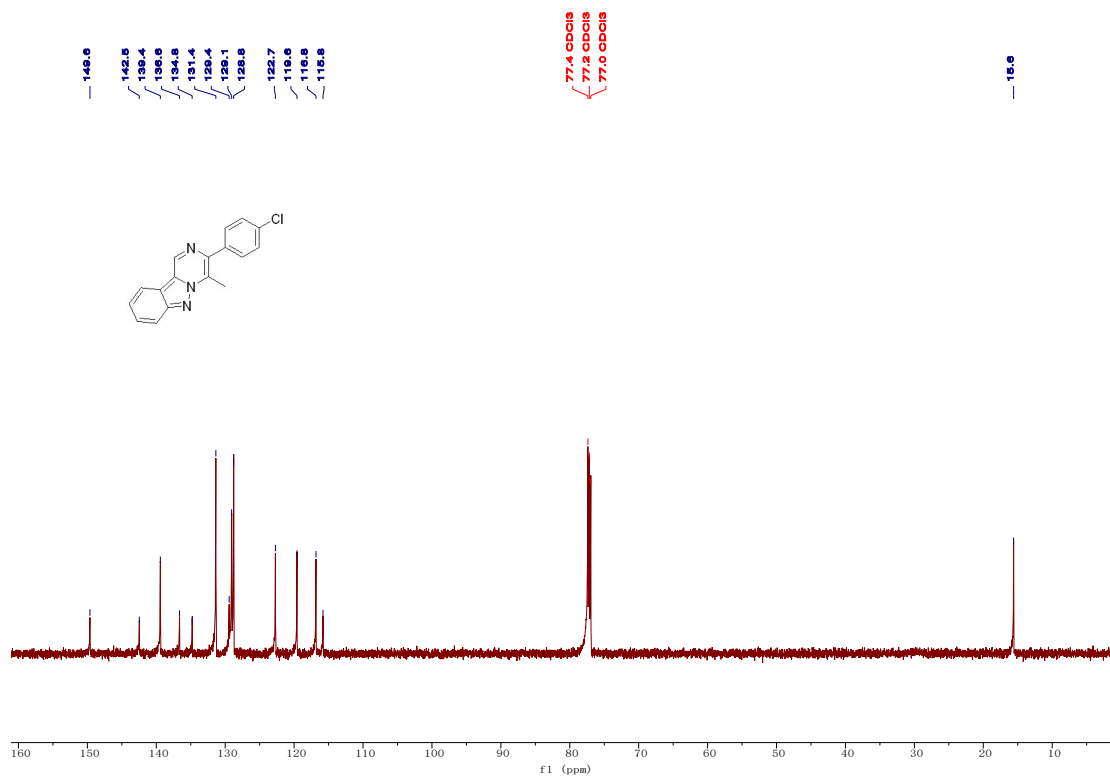



## 7. Single-crystal X-ray Diffraction

Single crystal of **3aa** was grown by slow evaporation of its dichloromethane/methanol/petroleum ether solution.

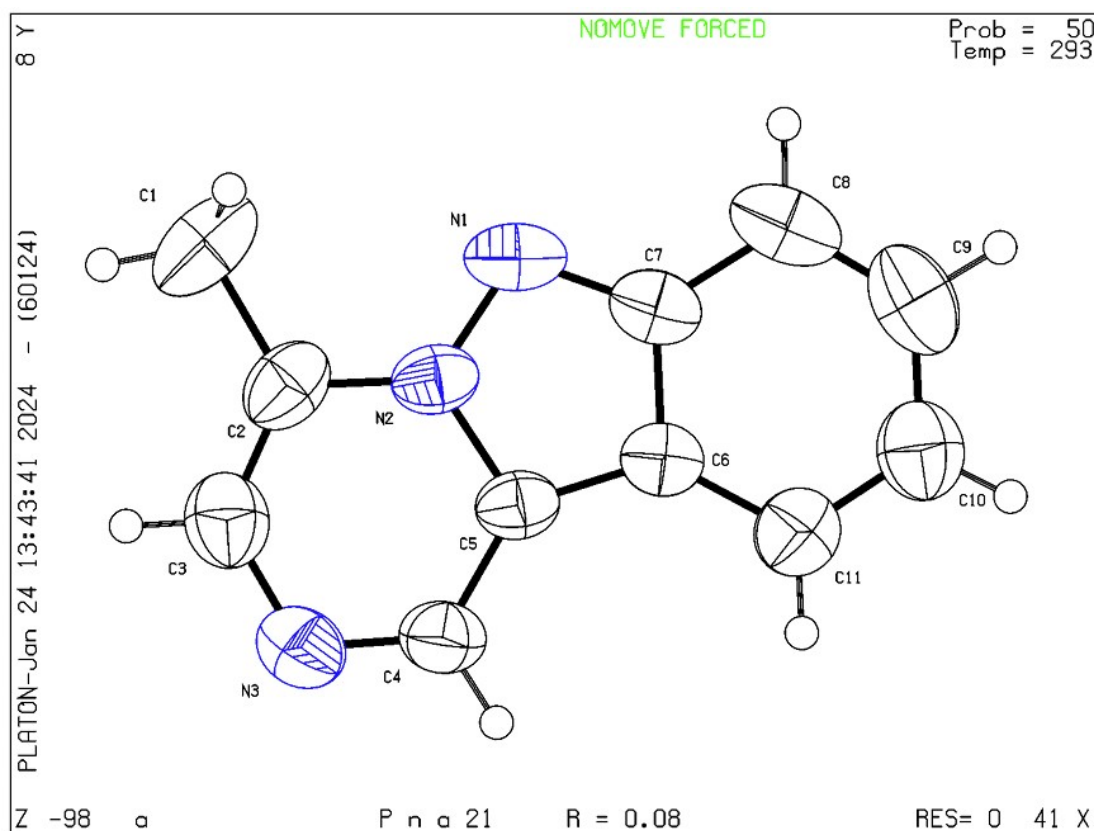

Figure S1. X-ray single crystal structure of **3aa**

Table S2 Crystal data and structure refinement for **3aa**.

|                                    |                                               |
|------------------------------------|-----------------------------------------------|
| Identification code                | 3aa                                           |
| Empirical formula                  | C <sub>11</sub> H <sub>9</sub> N <sub>3</sub> |
| Formula weight                     | 183.21                                        |
| Temperature/K                      | 293.15                                        |
| Crystal system                     | orthorhombic                                  |
| Space group                        | Pna2 <sub>1</sub>                             |
| a/Å                                | 13.009(3)                                     |
| b/Å                                | 15.324(3)                                     |
| c/Å                                | 4.6638(9)                                     |
| α/°                                | 90                                            |
| β/°                                | 90                                            |
| γ/°                                | 90                                            |
| Volume/Å <sup>3</sup>              | 929.7(3)                                      |
| Z                                  | 4                                             |
| ρ <sub>calc</sub> /cm <sup>3</sup> | 1.309                                         |
| μ/mm <sup>-1</sup>                 | 0.082                                         |
| F(000)                             | 384.0                                         |
| Crystal size/mm <sup>3</sup>       | 0.19 × 0.18 × 0.18                            |
| Radiation                          | MoKα (λ = 0.71073)                            |

2 $\theta$  range for data collection/ $^{\circ}$  4.108 to 49.996  
Index ranges  $-15 \leq h \leq 15, -18 \leq k \leq 18, -5 \leq l \leq 5$   
Reflections collected 6472  
Independent reflections 1541 [ $R_{\text{int}} = 0.1180, R_{\text{sigma}} = 0.0602$ ]  
Data/restraints/parameters 1541/1/128  
Goodness-of-fit on  $F^2$  1.053  
Final R indexes [ $I \geq 2\sigma(I)$ ]  $R_1 = 0.0775, wR_2 = 0.2056$   
Final R indexes [all data]  $R_1 = 0.0792, wR_2 = 0.2102$   
Largest diff. peak/hole /  $e \text{ \AA}^{-3}$  0.18/-0.20  
Flack parameter -10.0(10)

## 8. References

1. A. Chevalier, A. Ouahrouch, A. Arnaud, T. Gallavardin and X. Franck, *RSC Adv*, 2018, **8**, 13121-13128.
2. M. Duan, G. Hou, Y. Zhao, C. Zhu and C. Song, *J Org Chem*, 2022, **87**, 11222-11225.
3. A. Gudmundsson, K. P. J. Gustafson, B. K. Mai, V. Hobiger, F. Himmo and J.-E. Bäckvall, *ACS Catalysis*, 2019, **9**, 1733-1737.
4. W. Wang, J. Wang, J. Wu, M. Jin, J. Li, S. Jin, W. Li, D. Xu, X. Liu and G. Xu, *J Agric Food Chem*, 2022, **70**, 7566-7575.
